# Supplementary material for: Re-equilibration of quartz inclusions in garnet
Source: Copernicus journal article supplement (doi:10.5194/ejm-36-581-2024), 2024-08-08

Figure S1. Reflected light photomicrographs of select garnets from two-stage decompression experiment SR-3 (Fig. 3, Table 2) showing the various stages of decrepitation.


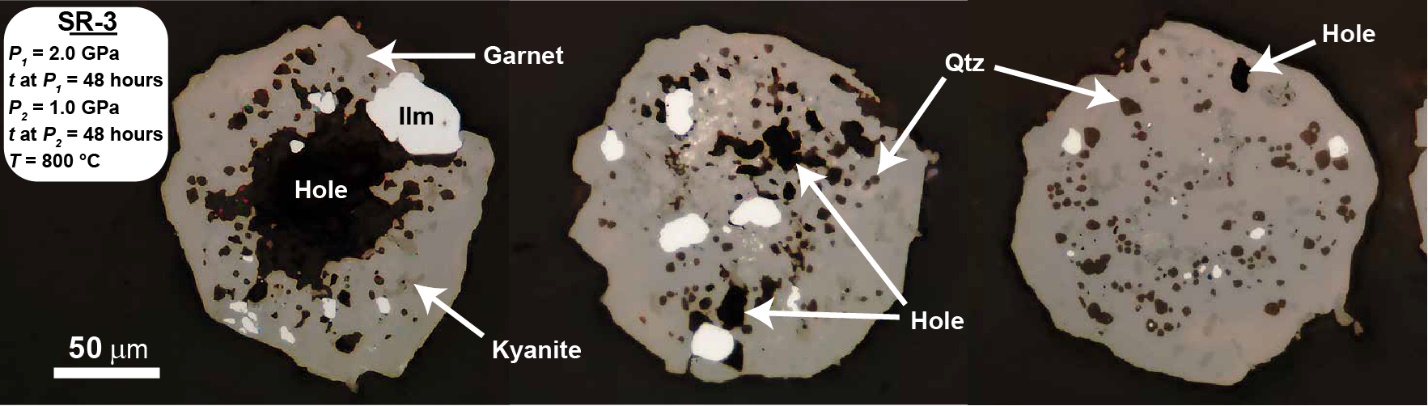

Supplement: Supplementary file 1 [file Fig. S1.docx]
