# Supplementary material for: Re-equilibration of quartz inclusions in garnet
Source: Copernicus journal article supplement (doi:10.5194/ejm-36-581-2024), 2024-08-08

Figure S2. Isomeke density plots calculated from individual quartz inclusion measurements from (a) SR-21, (b) SR-7, (c) SR-5, and (d) SR-26. Bold black curves are the isomekes for P1, P2, and P3.


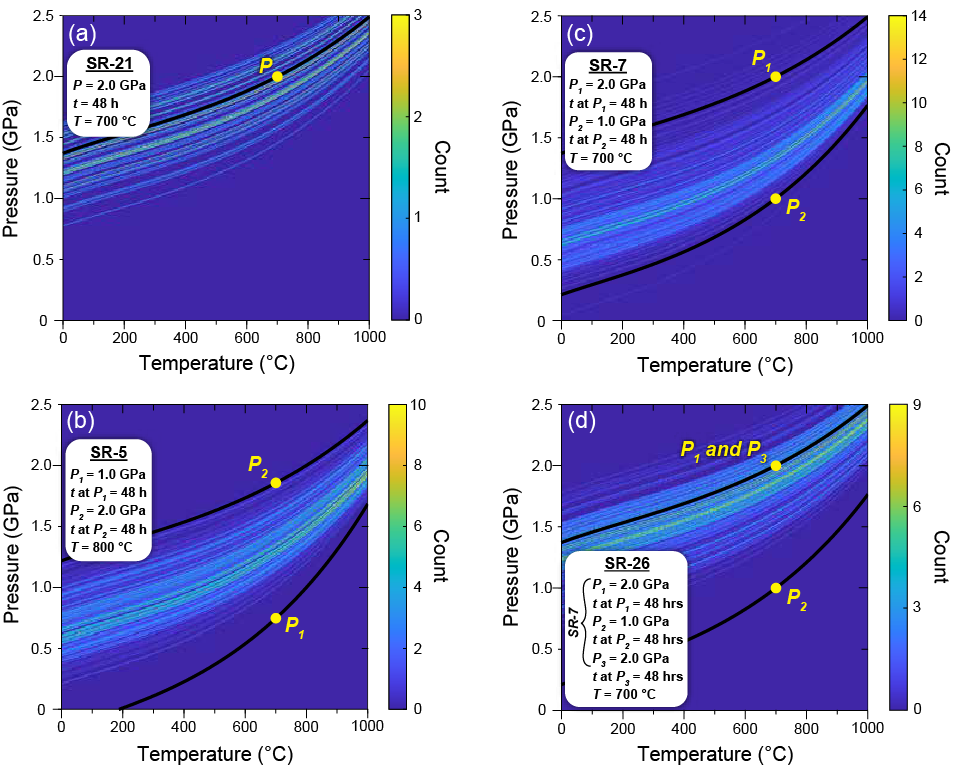

Supplement: Supplementary file 2 [file Fig. S2.docx]
