# Supplementary material for: Re-equilibration of quartz inclusions in garnet
Source: Copernicus journal article supplement (doi:10.5194/ejm-36-581-2024), 2024-08-08
Supplement: Supplementary file 3 [file QuiG-SR Wavenumber Shift Data.xlsx]

## Sheet: SR-3
Inclusion Number	Δ128	Δ206	Δ464
3-1-1-1	3.2312	10.2576	6.5786
3-1-1-2	1.0972	4.5806	1.8356
3-1-1-3	2.0592	8.1446	3.1046
3-1-1-4	0.3842	7.8206	1.7506
3-1-1-5	4.0732	8.9496	5.8446
3-1-1-6	2.8412	9.6496	4.8556
3-1-2-1	0.1992	6.0586	1.2506
3-1-2-2	1.9662	7.5646	3.3516
3-1-2-3	3.2252	11.3426	5.2956
3-1-2-4	3.6392	12.4446	5.6086
3-1-2-5	3.0092	10.1926	4.5536
3-1-2-6	1.1722	8.2606	3.9626
3-1-2-7	3.8222	13.5516	5.7136
3-1-2-8	3.3082	9.8376	6.0306
3-1-2-9	3.1062	12.0786	5.4716
3-1-2-10	3.3622	12.5956	5.7206
3-1-2-11	3.2132	11.3506	5.4496
3-1-2-12	3.7982	12.8686	5.6446
3-1-2-13	2.1712	7.4776	4.4596
3-1-2-14	2.9622	7.6656	6.1596
3-1-2-15	-0.2138	1.7586	0.5316
3-1-2-16	3.0242	8.7676	4.6946
3-1-2-17	3.8152	11.8666	6.0426
3-1-2-18	1.6732	7.2576	1.0596
3-1-2-19	1.9642	8.3146	4.4416
3-1-2-20	2.6052	8.3046	5.6546
3-1-2-22	3.7742	12.0726	5.8026
3-1-3-1	0.7212	6.9766	1.4666
3-1-3-2	3.2822	7.6566	4.5916
3-1-3-3	3.6312	9.1366	5.4546
3-1-3-4	-0.2828	4.8636	0.7276
3-1-3-5	1.9002	7.6826	3.3546
3-1-3-6	1.1252	5.4226	2.4416
3-1-3-7	1.7822	7.5086	3.4866
3-1-3-8	2.0832	7.8376	3.6276
3-1-3-9	0.6382	6.2476	1.8216
3-1-3-10	4.1682	9.9426	6.2656
3-1-3-11	0.9242	4.0066	1.6046
3-1-3-12	0.8532	6.6876	0.9076
3-1-3-14	2.4552	9.4046	4.2986
3-1-3-15	2.9762	9.8376	4.4306
3-1-3-16	2.0912	8.7936	5.2616
3-1-3-17	2.5012	8.7916	3.7786
3-1-3-18	4.6632	8.6286	7.2336
3-1-3-19	2.9762	8.9746	5.6876
3-1-3-20	3.0612	10.3386	5.0086
3-1-3-21	0.0042	6.2106	1.9386
3-1-3-23	2.8542	9.2296	4.6366
3-1-3-24	3.7172	10.6086	6.0366
3-1-3-25	0.0852	7.4336	1.5196
3-1-3-26	2.3302	9.4536	4.0426
3-1-3-27	1.7402	7.2396	2.7266
3-1-3-28	2.1922	7.6646	3.7526
3-1-3-29	1.1712	5.1196	2.0206
3-1-3-30	3.6982	10.3246	5.9156
3-1-3-31	3.1632	10.7526	4.9066
3-1-3-32	3.6142	8.5316	4.7206
3-1-3-33	0.3502	6.3096	3.3096
3-1-3-34	2.4472	7.3926	5.1356
3-1-3-35	3.0202	10.9086	5.5086
3-1-3-36	3.8342	8.6216	5.9956
3-1-3-37	0.4962	4.9166	1.3046
3-1-3-38	-0.2208	3.6776	1.2936
3-1-3-39	0.7602	5.1966	1.7936
3-1-4-1	2.1912	7.1726	3.7426
3-1-4-2	1.7562	7.2276	3.6916
3-1-4-3	1.0312	7.5606	1.9636
3-1-4-4	0.9252	6.2756	1.4466
3-1-4-5	4.0332	12.0656	5.7396
3-1-4-6	-0.6068	3.9116	0.9846
3-1-4-7	0.1332	3.4896	1.0306
3-1-4-8	0.6942	6.7946	0.0666
3-1-4-9	1.6802	7.8936	2.9426
3-1-4-10	1.1122	7.7846	2.2516
3-1-4-11	0.3872	5.4366	1.5756
3-1-4-12	1.8162	7.7736	3.6216
3-1-4-13	-0.4778	3.7696	0.7906
3-1-4-14	-0.0408	5.4986	1.0666
3-1-4-15	0.1692	5.9516	1.4846
3-1-4-16	-0.6438	6.4536	1.3276
3-1-4-17	0.0592	3.7056	1.0026
3-1-4-18	1.5062	8.2266	3.0516
3-1-4-19	2.3792	9.6126	4.5836
3-1-4-20	0.3172	5.1196	0.9466
3-1-4-21	2.1572	7.1826	2.9596
3-1-4-22	1.7492	6.4996	0.8156
3-1-4-23	3.6852	11.0586	6.0836
3-1-4-24	3.1062	8.8746	5.2206
3-1-4-25	2.3852	9.1856	5.2216
3-1-4-26	1.4162	6.4236	2.4986
3-1-4-27	3.2232	12.6996	5.6776
3-1-4-28	0.3232	3.4656	1.0796
3-1-5-1	-0.0818	6.0186	1.0306
3-1-5-2	-0.8068	3.2546	0.3356
3-1-5-3	-0.2768	3.2206	1.0366
3-1-5-4	-0.1078	6.6436	1.0776
3-1-5-6	-0.6208	6.0966	0.9466
3-1-5-8	3.4002	9.9856	6.5916
3-1-5-9	1.1212	6.3666	2.1446
3-1-5-10	2.5082	8.6596	5.5136
3-1-6-1	1.0482	5.2586	1.7446
3-1-6-2	3.0072	12.1206	4.9766
3-1-6-3	-0.9678	6.1666	1.0876
3-1-7-1	0.3282	5.8906	1.1606
3-1-7-2	2.5232	9.5566	4.1456
3-1-7-3	-0.1248	10.7256	2.6816
3-1-7-4	-0.3048	7.6296	2.4626
3-1-7-5	0.4322	5.3066	1.2846
3-1-7-6	-0.7978	4.9196	1.0336
3-1-7-7	4.0352	6.6456	6.5126
3-1-7-8	0.2072	3.3266	0.9526
3-1-7-9	3.3602	8.2216	5.0436
3-1-7-10	1.1932	7.1666	2.3146
3-1-7-11	1.6032	5.8566	1.0666
3-1-8-1	2.9372	7.4196	4.2696
3-1-8-2	2.3512	9.3276	4.0186
3-1-8-3	1.7512	6.9016	1.2776
3-1-8-5	2.3792	8.4016	3.3556
3-1-8-6	1.5152	7.4076	3.1006
3-1-8-8	0.4052	7.6706	1.4206
3-1-8-10	0.7212	4.6706	2.3816
3-1-8-11	2.4562	8.7076	4.4326
3-1-9-1	3.3782	8.4226	4.4736
3-1-9-2	2.9882	9.3506	6.1766
3-1-9-3	3.5932	8.6116	5.4276
3-1-9-4	3.7552	10.5126	5.3756
3-2-1-1	3.6482	12.5306	5.6696
3-2-1-2	-0.2058	2.2346	0.9916
3-2-1-3	-0.0688	6.7686	0.9046
3-2-1-5	3.3982	12.2666	5.7016
3-2-1-6	3.0612	10.7816	5.5226
3-2-1-7	2.4382	10.5786	5.3936
3-2-1-8	1.1262	5.5936	2.4586
3-2-1-9	1.6222	6.7576	3.3016
3-2-1-10	2.1362	8.0766	4.1506
3-2-1-11	0.2342	4.4486	1.5796
3-2-1-12	-0.5178	5.9846	1.0626
3-2-1-13	2.6862	10.1696	5.7656
3-2-2-1	2.1192	8.1316	4.5166
3-2-2-2	-0.0618	4.3506	0.5686
3-2-2-3	-0.0088	2.6796	0.8556
3-2-2-4	1.6122	9.7406	4.2196
3-2-2-5	2.0822	7.1146	1.6656
3-2-2-6	1.0792	6.2266	1.1786
3-2-2-7	0.8562	6.7706	3.0836
3-2-2-8	0.4342	5.0266	1.7266
3-2-2-9	0.1242	2.3486	0.7466
3-2-2-11	0.4212	7.5766	1.5936
3-2-2-12	2.2662	7.5616	4.3796
3-2-3-1	3.0742	11.6166	5.5006
3-2-3-2	1.9792	11.6786	4.8366
3-2-3-3	2.3342	7.2136	3.1546
3-2-3-4	1.1352	7.1236	3.2866
3-2-3-5	0.7872	6.4496	1.8276
3-2-3-6	-0.7108	6.3106	1.4536
3-2-4-1	2.9062	9.9786	4.8606
3-2-4-3	4.0082	14.0866	6.4136
3-2-4-4	3.1232	11.9696	4.8486
3-2-4-5	2.0862	9.4506	5.5276
3-2-4-6	-0.6068	3.9116	0.9846
3-2-4-9	2.5482	9.4826	4.8396
3-2-4-10	3.1702	7.6676	5.2216
3-2-4-11	-0.1388	6.4486	1.5166
3-2-4-12	3.2812	7.4826	5.5276
3-2-4-13	3.4112	7.5976	6.0496
3-2-4-14	2.9962	9.3186	6.0486
3-2-4-15	3.4592	8.3596	5.9586
3-2-4-16	-0.9088	5.4596	1.0506
3-2-4-17	0.4352	2.2776	1.1216
3-2-4-18	0.1032	4.8846	1.1436
3-2-4-19	3.0092	9.8086	5.3856
3-2-4-20	3.2982	11.4406	4.8956
3-2-4-21	1.5372	7.3616	3.2976
3-2-4-22	2.7802	10.3556	4.3706
3-2-4-23	2.8522	11.1426	4.5296
3-2-4-24	1.1622	6.1526	2.7076
3-2-4-25	2.8112	7.6796	4.4506
3-2-4-26	1.2342	7.9916	2.8156
3-2-4-27	0.1522	4.6686	1.6156
3-2-4-29	1.8622	6.9986	3.1916
3-2-4-30	1.8922	7.3046	2.4606
3-2-4-31	3.2172	8.8006	5.5836
3-2-4-32	1.2352	7.2436	4.3246
3-2-4-33	1.9542	8.8816	3.5546
3-2-4-34	1.8482	8.0016	2.6786
3-2-5-1	2.7712	9.8436	4.5046
3-2-5-2	2.1262	9.4516	5.0416
3-2-5-3	2.4112	7.1496	3.4496
3-2-5-4	2.5992	7.5156	5.2436
3-2-5-5	1.6022	6.4696	3.4056
3-2-5-6	1.8182	8.1706	3.1466
3-2-5-7	1.8022	6.8696	3.5716
3-2-5-8	1.2342	6.7466	2.4866
3-2-5-10	1.58667	8.31433	3.39333
3-2-5-11	2.52867	8.09833	4.01533
3-2-5-12	1.18267	6.24533	2.81133
3-2-5-13	0.0276667	4.55933	0.939333
3-2-5-14	2.22067	8.29333	4.39033
3-2-5-15	1.91067	8.55433	4.58233
3-2-5-16	0.963667	7.37633	3.52933
3-2-5-18	2.30567	8.40333	4.11833
3-2-5-19	2.27467	8.50433	4.47433
3-2-5-21	2.16467	8.69633	3.83633
3-2-5-22	2.23967	7.14733	3.16533
3-2-5-23	3.06667	8.43933	4.64833
3-2-5-24	1.24567	5.89133	2.71533
3-2-6-1	2.32767	9.45533	4.24833
3-2-6-2	4.14167	14.0233	7.35933
3-2-6-3	3.29067	8.86333	6.59233
3-2-6-4	3.61967	8.47233	6.28333
3-2-6-5	0.736667	5.35133	0.757333
3-2-6-6	-0.135333	4.68633	1.02833
3-2-6-7	2.77367	10.9683	4.70933
3-2-6-8	1.65267	5.99233	4.16633
3-2-6-9	1.97067	10.1533	4.17233
3-2-6-10	1.81167	7.20233	2.86733
3-2-6-11	1.50367	8.50133	4.22033
3-2-6-12	0.984667	7.52733	2.03833
3-2-7-1	1.44667	5.98433	2.41633
3-2-7-3	0.559667	4.94133	2.21633
3-2-8-1	1.68467	9.20533	4.01233
3-2-8-2	-0.466333	3.27733	0.730333
3-2-8-3	-0.177333	4.18633	1.21933
3-2-8-4	3.67667	12.9243	6.33333
3-2-8-5	-0.553333	5.79733	1.34833
3-2-8-6	0.600667	5.35133	0.757333
3-2-10-1	1.11667	6.21833	2.09633
3-2-10-2	2.27967	8.95633	5.03833

## Sheet: SR-5
Inclusion Number	Δ128	Δ206	Δ464
5-1-1-1	0.443	6.643	1.22
5-1-1-2	4.361	12.78	7.005
5-1-1-3	4.13	14.056	7.339
5-1-1-5	3.424	9.441	5.104
5-1-1-6	3.189	9.151	5.256
5-1-1-7	0.954	7.452	2.442
5-1-1-8	2.675	7.998	3.67
5-1-1-9	2.146	9.032	5.469
5-1-1-11	1.745	6.558	1.588
5-1-1-12	3.473	9.42	5.215
5-1-1-13	2.297	8.929	4.587
5-1-1-14	2.659	8.174	3.638
5-1-1-15	2.953	8.36	4.589
5-1-1-16	3.243	8.966	4.422
5-1-1-17	2.71	8.7	5.008
5-1-1-18	2.93	8.734	4.65
5-1-1-19	3.017	8.298	4.643
5-1-1-20	2.037	8.976	3.769
5-1-1-21	3.037	7.924	4.218
5-1-1-23	2.654	7.234	4.495
5-1-1-24	3.199	9.993	5.875
5-1-1-25	3.979	12.334	5.748
5-1-1-26	4.287	13.712	6.44
5-1-1-27	3.836	12.732	6.301
5-1-1-28	3.943	13.556	6.22
5-1-1-29	2.752	7.095	3.723
5-1-1-30	3.883	12.264	5.708
5-1-1-31	2.934	10.416	5.856
5-1-1-32	3.752	9.017	5.878
5-1-1-33	2.674	10.157	6.408
5-1-1-34	4.557	12.384	6.643
5-1-1-36	1.515	7.398	1.913
5-1-1-37	3.841	12.262	6.84
5-1-1-38	3.887	11.628	6.364
5-1-1-39	2.561	10.265	6.29
5-1-1-40	3.993	11.72	6.311
5-1-1-41	4.388	9.386	6.419
5-1-1-42	4.314	14.883	6.494
5-1-1-43	3.144	11.981	6.32
5-1-1-44	3.312	10.392	6.847
5-1-1-46	4.295	16.079	6.598
5-1-1-47	4.015	13.634	6.665
5-1-1-48	3.927	12.707	6.32
5-1-1-49	3.828	11.066	6.374
5-1-1-51	0.224	7.628	0.997
5-1-1-52	3.626	8.919	4.89
5-1-1-53	4.829	16.073	6.842
5-1-1-54	4.103	15.865	6.953
5-1-1-55	3.608	12.281	6.224
5-1-1-56	3.794	8.934	6.889
5-1-1-57	4.277	14.013	6.154
5-1-1-58	2.946	8.252	3.591
5-1-1-59	3.235	10.577	5.944
5-1-1-60	3.698	10.654	6.142
5-1-1-61	3.213	11.069	6.282
5-1-1-62	4.126	13.853	6.339
5-1-1-63	4.162	12.036	6.423
5-1-1-64	4.206	12.149	6.498
5-1-1-65	4.234	12.431	6.491
5-1-1-66	3.915	11.163	6.837
5-1-1-67	4.152	8.375	6.679
5-1-1-68	4.065	9.234	5.539
5-1-1-69	4.309	13.121	6.526
5-1-1-70	4.344	10.399	6.912
5-1-1-71	3.035	11.173	5.479
5-1-1-72	4.006	11.614	7.073
5-1-1-73	4.801	11.64	7.46
5-1-1-74	3.061	12.368	5.58
5-1-1-75	3.848	9.471	5.509
5-1-1-76	4.795	9.419	6
5-1-1-77	3.621	12.817	5.884
5-1-1-78	2.893	8.468	6.081
5-1-1-79	3.474	8.582	6.383
5-1-2-1	2.481	12.159	5.91
5-1-2-2	3.298	10.997	5.672
5-1-2-3	4.063	11.707	6.548
5-1-2-5	3.852	7.232	5.834
5-1-2-6	2.501	9.523	6.486
5-1-2-7	4.085	12.234	6.499
5-1-2-8	3.262	13.136	6.383
5-1-2-9	3.73	10.165	6.396
5-1-2-10	3.547	13.048	6.261
5-1-2-11	4.301	11.661	6.558
5-1-2-13	2.512	11.242	5.397
5-1-2-14	4.019	13.105	5.841
5-1-2-15	3.256	11.657	6.174
5-1-2-17	3.975	14.222	6.656
5-1-2-19	3.103	7.942	4.643
5-1-2-20	3.705	14.353	6.413
5-1-2-21	3.882	11.256	6.433
5-1-2-22	3.035	9.167	5.574
5-1-2-24	2.965	11.412	5.769
5-1-2-25	3.161	9.16	5.407
5-1-2-26	3.257	10.46	5.951
5-1-3-3	2.961	9.948	5.359
5-1-3-4	2.368	6.968	5.589
5-1-3-5	3.652	9.903	5.618
5-1-4-1	4.515	16.393	6.813
5-1-4-2	1.065	6.792	3.748
5-1-4-3	3.955	13.526	6.58
5-1-4-4	4.295	12.538	6.681
5-1-4-5	3.284	8.655	5.908
5-1-4-7	3.917	7.996	5.044
5-1-4-8	2.573	11.214	6.644
5-1-4-9	3.714	12.437	5.109
5-1-4-10	3.666	8.124	5.313
5-1-4-11	3.744	9.279	6.207
5-1-4-12	3.633	13.921	6.68
5-1-4-13	4.247	11.072	6.723
5-1-4-14	4.629	10.891	6.498
5-1-4-16	0.701	7.832	3.708
5-1-4-18	4.27	12.804	6.785
5-1-4-21	4.169	12.152	6.79
5-1-4-22	4.235	12.593	7.316
5-1-4-23	4.363	9.127	6.971
5-1-4-24	3.416	6.578	6.244
5-1-4-25	5.278	14.306	7.072
5-1-4-26	3.489	14.09	6.543
5-1-4-27	4.372	11.109	5.987
5-1-5-1	0.465	7.018	2.619
5-1-5-4	3.276	13.066	5.793
5-1-5-6	4.048	15.028	6.778
5-1-5-7	3.283	8.332	6.518
5-1-5-8	2.613	13.312	6.127
5-1-5-9	3.788	11.541	5.667
5-1-5-10	3.869	12.957	6.133
5-1-5-11	2.763	14.599	6.114
5-1-5-12	3.847	13.285	5.566
5-1-5-13	3.421	10.831	6.132
5-1-5-14	2.032	6.66	3.158
5-1-5-15	3.736	12.21	6.597
5-1-5-17	3.394	9.792	6.205
5-1-5-21	3.727	9.311	6.643
5-1-5-23	4.095	14.016	6.407
5-1-5-25	2.997	11.096	6.567
5-1-5-26	3.609	10.008	5.967
5-1-5-28	4.556	12.199	6.87
5-1-5-29	3.616	11.431	6.572
5-1-6-1	3.677	12.957	5.337
5-1-6-2	3.768	11.653	6.083
5-1-6-3	3.905	14.646	7.068
5-1-6-4	1.033	6.992	3.317
5-1-6-5	1.035	7.091	2.266
5-1-6-8	0.617	7.35	3.483
5-1-6-9	1.659	7.77	4.265
5-1-6-10	3.026	14.682	5.239
5-1-6-11	3.517	8.439	5.105
5-1-6-12	2.105	9.019	5.125
5-1-6-13	1.895	10.224	4.201
5-1-6-14	3.399	10.633	6.02
5-1-6-15	3.656	10.175	5.814
5-1-6-16	0.144	5.776	1.304
5-1-6-17	2.921	10.152	4.14
5-1-6-18	3.884	8.527	5.4
5-1-6-19	2.56	10.476	4.906
5-1-6-20	3.773	7.617	4.366
5-1-6-21	3.501	8.23	5.078
5-1-6-22	3.382	11.702	4.854
5-1-6-23	2.196	7.815	4.694
5-1-6-24	2.119	9.744	4.483
5-1-6-25	3.136	10.451	4.725
5-1-6-26	2.358	7.145	5.081
5-1-6-27	2.665	7.987	4.475
5-1-6-29	1.35	7.366	4.454
5-1-6-30	3.468	9.429	5.007
5-1-6-31	2.69	9.313	5.677
5-1-6-32	2.968	9.811	6.139
5-1-6-33	3.076	12.021	5.917
5-1-6-34	3.493	10.367	5.907
5-1-6-35	4.378	7.993	6.199
5-1-6-36	3.928	6.875	6.464
5-1-6-37	2.217	8.871	5.078
5-1-6-38	2.835	8.185	5.053
5-1-6-39	2.352	8.749	5.079
5-1-6-40	3.152	10.034	5.007
5-1-6-41	3.781	10.031	4.498
5-1-6-42	4.059	7.229	6.019
5-1-6-43	3.619	12.657	5.589
5-1-6-44	4.312	11.159	6.316
5-1-6-45	3.514	11.541	6.316
5-1-6-46	4.223	13.595	6.404
5-1-6-47	3.298	11.183	5.599
5-1-6-48	4.338	10.59	6.125
5-1-6-49	2.417	10.65	6.446
5-1-6-50	4.19	11.54	6.027
5-1-6-51	3.047	10.06	5.349
5-1-6-52	3.135	9.885	4.834
5-1-6-53	2.767	9.189	5.24
5-1-6-55	3.031	7.819	4.607
5-1-6-56	3.964	8.366	6.319
5-1-7-1	4.165	13.341	6.921
5-1-7-2	0.795	8.055	3.062
5-1-7-3	0.776	7.682	3.355
5-1-7-4	2.827	9.808	5.896
5-1-7-5	4.687	12.492	6.453
5-1-7-6	4.119	11.695	6.197
5-1-7-7	3.23	12.403	6.828
5-1-7-8	4.303	10.491	6.265
5-1-7-9	2.955	9.602	6.267
5-1-7-10	3.663	12.014	7
5-1-7-14	4.115	13.736	6.958
5-1-7-16	3.787	11.037	7.132
5-1-7-17	3.937	13.622	6.319
5-1-7-18	3.581	10.444	5.568
5-1-7-19	2.453	8.866	5.521
5-1-7-20	4.373	9.946	5.654
5-1-8-1	3.734	13.838	6.359
5-1-8-2	2.682	10.585	6.273
5-1-8-3	4.138	12.462	6.992
5-1-8-6	4.26	10.834	6.223
5-1-8-7	3.817	10.558	6.448

## Sheet: SR-7
Inclusion Number	Δ128	Δ206	Δ464
7-1-1-1	2.946	10.274	5.23
7-1-1-2	3.014	11.094	5.441
7-1-1-3	1.857	7.076	4.271
7-1-1-4	2.827	7.691	3.655
7-1-1-5	2.908	7.743	2.82
7-1-1-6	3.219	9.572	5.296
7-1-1-7	3.105	12.295	5.463
7-1-1-8	0.522	5.448	2.015
7-1-1-9	1.878	8.125	4.329
7-1-1-11	3.883	14.05	5.949
7-1-1-12	2.377	10.932	5.364
7-1-1-13	4.858	16.685	8.492
7-1-1-14	3.715	14.434	5.668
7-1-1-15	1.183	7.849	3.698
7-1-1-16	4.003	10.614	7.354
7-1-1-17	2.572	9.189	3.667
7-1-1-18	4.886	13.282	7.53
7-1-1-19	2.498	9.087	3.882
7-1-1-20	2.467	6.898	2.879
7-1-1-21	3.773	10.047	5.202
7-1-1-22	3.773	9.854	3.95
7-1-1-23	1.462	9.164	4.513
7-1-1-24	2.797	8.78	3.378
7-1-1-25	0.856	7.581	1.953
7-1-1-26	1.758	11.884	3.976
7-1-1-27	2.534	9.344	4.763
7-1-1-28	1.618	8.008	2.6
7-1-1-29	2.989	9.835	4.74
7-1-1-30	1.98	7.973	4.449
7-1-1-31	2.594	9.544	4.243
7-1-1-32	4.106	8.891	5.636
7-1-1-33	4.49	14.554	7.666
7-1-1-34	5.159	18.744	7.549
7-1-1-35	4.632	14.35	7.583
7-1-1-36	1.202	10.866	3.665
7-1-1-38	1.748	6.886	2.976
7-1-1-39	2.502	7.74	3.487
7-1-1-40	2.286	8.495	3.656
7-1-1-41	2.189	7.223	2.951
7-1-1-42	1.34	5.232	1.897
7-1-1-43	2.356	7.536	3.844
7-1-2-1	0.54	1.429	0.996
7-1-2-2	1.515	6.45	2.883
7-1-2-3	4.601	15.935	7.538
7-1-2-4	2.773	9.412	5.08
7-1-2-5	3.079	9.976	3.955
7-1-2-6	2.996	8.316	4.519
7-1-2-7	1.522	6.743	2.745
7-1-2-8	2.476	9.382	4.81
7-1-2-9	1.111	5.861	2.111
7-1-2-10	2.114	7.959	3.479
7-1-2-11	1.434	6.186	2.422
7-1-2-12	1.873	8.442	3.982
7-1-2-13	3.6	11.573	5.334
7-1-2-14	2.154	8.972	3.833
7-1-2-15	2.708	8.945	3.803
7-1-2-16	2.291	9.143	4.447
7-1-2-17	2.783	10.122	4.306
7-1-2-18	3.077	9.453	4.301
7-1-2-19	2.145	9.151	4.055
7-1-2-20	1.812	6.269	2.682
7-1-3-1	5.8183	20.6087	8.774
7-1-3-2	2.965	10.485	4.447
7-1-3-3	2.059	8.549	3.477
7-1-3-4	3.685	13.047	5.426
7-1-3-5	3.738	11.825	5.344
7-1-3-6	4.219	10.808	5.657
7-1-3-7	2.18	9.325	3.984
7-1-3-8	2.487	9.164	3.879
7-1-3-9	3.127	9.579	4.554
7-1-3-10	2.317	9.444	3.72
7-1-3-11	2.161	8.769	3.794
7-1-3-12	2.903	9.693	5.356
7-1-3-13	2.029	8.884	5.179
7-1-3-14	3.72	13.745	5.556
7-1-3-15	1.835	7.266	3.497
7-1-3-16	2.184	10.232	4.343
7-1-3-17	2.891	11.613	4.941
7-1-4-1	0.713	6.923	3.74
7-1-5-1	1.494	7.9	2.966
7-1-5-2	1.068	12.895	3.45
7-1-6-1	0.784	5.494	2.257
7-1-6-2	3.634	13.848	5.438
7-1-7-1	2.041	9.047	4.023
7-1-7-2	2.336	7.769	3.631
7-1-7-3	2.5	9.547	5.188
7-1-7-4	2.55	8.392	4.238
7-1-7-5	0.723	6.858	1.915
7-1-7-6	4.259	15.114	6.993
7-1-7-7	2.219	8.174	4.21
7-1-7-8	3.878	14.415	5.504
7-1-7-9	2.751	12.693	5.592
7-1-7-10	0.084	5.171	1.263
7-1-7-11	1.894	8.541	3.611
7-1-7-12	1.279	8.088	3.591
7-1-7-13	4.403	13.078	8.629
7-1-7-14	2.099	9.893	4.415
7-1-7-15	2.99	9.881	3.13
7-1-7-16	3.518	9.18	7.667
7-1-7-17	0.896	5.326	2.443
7-1-7-18	4.142	16.656	6.563
7-1-7-19	3.711	12.587	6.209
7-1-7-20	5.008	13.739	7.943
7-1-7-21	4.194	15.548	7.261
7-1-7-22	2.644	8.006	4.1
7-1-7-23	2.227	9.282	4.292
7-1-7-24	0.277	5.274	1.362
7-1-7-25	1.798	8.148	3.217
7-1-8-1	1.878	9.059	3.417
7-1-8-2	1.79	7.663	3.585
7-1-8-3	1.985	10.122	4.083
7-1-8-4	0.294	6.284	1.593
7-1-8-5	2.271	7.965	2.737
7-1-8-6	3.949	15.007	6.423
7-1-8-7	2.686	11.96	5.435
7-1-8-8	0.924	6.506	1.902
7-1-8-9	3.644	13.814	6.318
7-1-8-10	0.725	3.871	1.553
7-1-8-11	2.056	9.417	3.58
7-1-8-12	2.039	9.023	3.698
7-1-8-13	2.237	10.466	3.688
7-1-8-14	2.673	10.507	3.999
7-1-8-15	2	9.441	3.97
7-1-9-1	5.123	18.13	7.904
7-1-9-2	4.47	14.897	7.178
7-1-9-3	2.759	8.794	6.746
7-1-9-4	1.182	8.453	4.106
7-1-9-5	1.015	9.05	1.509
7-1-9-6	2.481	11.152	3.839
7-1-9-7	2.159	9.604	4.178
7-1-10-1	2.122	9.844	3.88
7-1-10-2	1.117	7.198	2.588
7-1-10-3	3.453	12.556	5.213
7-1-10-4	3.917	15.595	6.429
7-1-10-5	3.432	12.501	5.109
7-1-10-6	1.872	7.939	3.08
7-1-10-7	2.995	11.795	4.696
7-1-10-8	3.831	14.357	6.411
7-1-10-9	2.33	10.219	4.377
7-1-10-10	1.803	7.967	3.167
7-1-10-11	3.218	13.448	6.352
7-1-10-12	1.571	8.646	3.3
7-1-12-1	2.123	6.915	2.88
7-1-12-2	3.046	10.715	5.051
7-1-12-3	1.629	9.181	3.872
7-1-12-4	2.331	6.483	2.922
7-1-12-5	4.59	15.819	7.49
7-1-12-6	5.167	14.434	7.762
7-1-12-7	4.905	13.31	7.512
7-1-12-8	2.615	10.533	4.682
7-1-12-9	2.419	9.384	4.766
7-1-12-10	4.195	14.473	6.687
7-1-12-11	2	9.091	3.856
7-1-12-12	1.289	6.489	2.924
7-1-12-13	3.473	12.04	4.913
7-1-12-14	2.234	8.248	4.37
7-1-14-1	1.522	6.199	3.554
7-1-14-2	4.045	11.936	6.646
7-2-1-1	2.175	9.984	4.407
7-2-1-2	2.147	11.815	4.87
7-2-1-3	1.993	9.485	3.873
7-2-1-4	2.852	10.505	5.141
7-2-2-1	4.058	16.712	7.072
7-2-2-3	2.59	8.936	3.142
7-2-4-1	4.171	7.959	7.271
7-2-5-1	1.158	6.592	2.031
7-2-6-1	4.071	14.612	7.996
7-2-6-2	2.691	9.812	3.779
7-2-6-3	2.804	10.536	4.675
7-2-6-4	2.611	8.884	4.697
7-2-7-1	3.777	15.914	6.158
7-2-7-2	3.782	15.183	6.388
7-2-7-3	5.561	18.218	9.019
7-2-7-4	2.644	9.491	4.378
7-2-7-6	4.87	19.523	8.036
7-2-7-7	4.789	9.821	8.202
7-2-7-8	1.764	7.49	3.161
7-2-7-9	1.014	9.604	2.925
7-2-7-10	3.606	8.963	4.761
7-2-7-11	3.849	10.467	4.609
7-2-7-12	2.347	7.662	3.391
7-2-8-1	2.152	9.815	3.885
7-2-8-2	4.815	18.606	8.091
7-2-8-3	2.105	8.53	4.043
7-2-8-4	3.83	8.67	5.873
7-2-8-5	2.803	8.472	6.506
7-2-8-6	2.277	10.004	4.422
7-2-10-1	2.557	7.881	4.178
7-2-12-1	3.043	11.906	4.587
7-2-12-2	3.046	10.72	5.051
7-2-12-3	5.415	16.348	8.181
7-2-12-4	4.711	14.102	8.818
7-2-13-1	1.559	6.633	2.867
7-2-13-2	2.512	10.148	4.411
7-2-14-1	1.192	8.521	4.082
7-2-14-2	1.101	6.333	1.804
7-2-14-3	1.822	6.389	2.68
7-2-14-4	1.851	8.787	4.041
7-2-14-5	2.104	9.095	3.546
7-2-14-6	2.178	9.661	4.165
7-2-14-7	2.869	12.426	5.359
7-2-14-8	1.287	12.54	3.984
7-2-14-9	3.737	10.844	6.618
7-2-14-10	3.747	11.573	6.275
7-2-14-11	4.04	14.831	7.847
7-2-14-12	0.43	6.709	2.048
7-2-14-13	3.306	10.789	5.268
7-2-14-14	2.023	10.926	4.008
7-2-14-16	2.163	9.182	3.567
7-2-14-17	2.034	8.872	3.611
7-3-5-1	5.0545	16.603	8.1685
7-3-5-2	5.6095	19.423	7.9385
7-3-6-1	4.3295	14.696	6.8165
7-3-6-2	4.4555	12.562	7.3505
7-3-6-3	4.0545	11.956	6.9995
7-3-7-1	4.8265	14.26	7.4425
7-3-7-2	4.1935	12.522	6.5845
7-3-7-3	1.8515	9.305	4.0705
7-3-7-4	4.8615	16.696	7.3895
7-3-7-5	3.8815	13.715	6.5505
7-3-7-6	4.1555	12.372	6.2935
7-3-7-7	4.8575	18.083	7.3095
7-3-7-8	1.8565	6.757	3.4735
7-3-7-9	1.7515	6.404	4.5725
7-3-8-1	3.6205	9.458	3.9285
7-3-9-1	4.1995	11.238	7.4265
7-4-1-1	2.1315	9.606	3.6765
7-4-3-1	2.3105	7.959	4.5005
7-4-3-2	3.8275	10.861	7.0965
7-4-3-3	4.6675	10.029	7.1765
7-4-3-4	1.5385	6.751	3.1235
7-4-3-5	5.0855	21.439	8.0415
7-4-3-6	3.4665	13.781	6.2765
7-4-3-7	3.0365	6.751	4.7145
7-4-3-8	2.5885	8.8	3.7955
7-4-3-9	1.5775	5.187	2.6485
7-4-3-10	1.5115	9.056	3.8185
7-4-5-1	4.7655	17.933	7.9255
7-4-5-2	1.2875	6.897	3.3595
7-4-5-3	2.0385	8.997	3.8395
7-4-5-4	1.7415	6.453	3.1405
7-4-5-5	2.7655	10.171	4.5025
7-4-5-6	2.9125	10.895	4.6475
7-4-5-7	3.2035	9.192	6.3045
7-4-5-8	2.7125	12.049	4.6235

## Sheet: SR-11
Inclusion Number	Δ128	Δ206	Δ464
11-1-1-1	5.411	8.473	6.702
11-1-1-2	5.668	17.934	7.636
11-1-1-3	3.267	12.073	7.684
11-1-1-5	3.271	13.987	6.851
11-1-1-7	3.817	14.886	7.55
11-1-1-8	4.605	8.572	7.037
11-1-1-11	4.671	18.686	7.681
11-1-1-12	5.162	13.302	7.152
11-1-1-13	4.172	12.021	6.651
11-1-1-14	5.302	13.187	7.73
11-1-1-15	4.394	13.183	7
11-1-1-16	5.273	15.101	7.492
11-1-1-17	5.289	16.168	7.419
11-1-1-18	4.227	16.704	7.746
11-1-1-20	5.39	17.47	7.557
11-1-1-21	3.718	11.581	5.668
11-1-1-22	3.972	13.099	6.401
11-1-1-23	4.988	17.418	6.628
11-1-1-24	5.71	12.377	7.102
11-1-1-25	4.085	16.183	6.518
11-1-1-27	3.958	13.925	7.04
11-1-1-28	3.535	13.56	6.447
11-1-1-29	4.171	11.445	6.269
11-1-1-30	4.066	14.12	7.105
11-1-1-31	4.389	12.921	6.338
11-1-1-32	3.771	14.906	6.313
11-1-1-33	5.315	7.794	8.4
11-1-1-34	3.803	12.383	6.238
11-1-1-36	4.015	12.912	7.465
11-1-1-37	4.743	13.173	6.531
11-1-1-39	5.816	17.392	7.123
11-1-1-40	4.617	17.166	6.996
11-1-1-41	4.703	15.902	6.653
11-1-1-42	4.574	14.144	7.023
11-1-1-43	4.344	13.53	6.281
11-1-1-44	3.89	14.501	6.396
11-1-1-45	4.666	11.354	6.035
11-1-1-46	3.982	17.275	7.081
11-1-1-47	3.627	12.262	6.926
11-1-1-48	4.055	13.727	6.374
11-1-1-49	4.152	14.186	6.536
11-1-1-50	3.764	9.73	6.084
11-1-1-51	4.136	16.427	6.96
11-1-1-52	4.085	12.89	6.224
11-1-1-53	4.557	15.288	6.588
11-1-1-54	4.574	16.428	6.486
11-1-1-55	4.96	14.225	7.03
11-1-1-56	2.891	12.247	6.817
11-1-1-57	3.006	9.631	5.881
11-1-1-58	4.323	13.757	6.169
11-1-1-59	3.328	11.049	6.484
11-1-1-60	3.873	12.75	6.464
11-1-1-61	3.674	16.413	6.945
11-1-1-62	4.027	16.597	6.573
11-1-1-63	4.113	15.334	6.496
11-1-1-64	3.842	11.269	5.888
11-1-1-65	4.06	12.851	6.249
11-1-1-66	3.942	11.412	6.034
11-1-1-67	3.783	11.053	6.122
11-1-1-68	2.651	10.652	5.696
11-1-1-70	3.701	12.932	5.8
11-1-1-71	3.129	13.289	5.403
11-1-1-72	2.939	7.755	2.565
11-1-1-73	3.755	6.24	7.247
11-1-1-74	2.782	11.051	5.001
11-1-1-75	4.309	15.225	6.477
11-1-1-76	4.719	13.846	7.165
11-1-2-1	4.358	15.378	6.744
11-1-2-2	4.57	17.138	7.468
11-1-2-3	3.44	11.648	5.353
11-1-2-4	3.701	8.35	3.906
11-1-2-6	4.529	12.798	6.866
11-1-2-7	4.208	10.832	6.483
11-1-2-9	1.389	7.676	3.783
11-1-2-10	3.461	12.372	5.448
11-1-2-11	4.235	12.868	6.153
11-1-2-12	3.204	12.698	6.026
11-1-2-13	3.684	11.856	5.017
11-1-2-14	3.302	12.388	6.057
11-1-2-15	3.419	10.123	6.86
11-1-2-18	4.252	14.769	6.472
11-1-2-20	3.96	14.304	6.736
11-1-2-21	3.272	12.436	7.159
11-1-2-22	3.541	11.459	5.7
11-1-2-23	3.395	12.805	7.232
11-1-2-25	3.528	14.919	6.742
11-1-2-26	4.308	15.958	7.206
11-1-2-27	4.579	15.712	6.72
11-1-2-28	4.404	13.004	5.72
11-1-2-29	1.228	7.235	2.145
11-1-2-30	4.465	13.145	6.391
11-1-2-31	4.19	13.619	6.248
11-1-2-32	4.286	14.202	6.281
11-1-2-34	3.085	15.78	7
11-1-2-37	4.411	15.857	7.38
11-1-2-38	4.103	16.978	6.753
11-1-2-39	3.835	11.296	4.709
11-1-2-40	3.771	12.944	6.878
11-1-2-41	4.457	12.934	6.877
11-1-2-42	4.256	17.086	6.659
11-1-2-43	4.344	13.322	6.281
11-1-2-44	4.062	15.047	6.321
11-1-2-45	4.358	13.174	6.496
11-1-2-46	3.864	13.312	7.461
11-1-2-47	3.998	13.343	6.353
11-1-2-48	3.897	13.162	5.656
11-1-2-49	3.075	12.59	5.462
11-1-2-50	4.58	15.916	6.97
11-1-2-51	4.088	17.019	6.935
11-1-2-52	4.357	13.075	5.525
11-1-2-53	3.181	14.471	6.722
11-1-2-54	4.268	14.002	6.338
11-1-2-55	3.332	15.083	7.021
11-1-2-56	4.092	16.263	6.468
11-1-2-57	3.596	11.578	6.326
11-1-2-58	3.655	13.398	6.26
11-1-2-59	2.978	12.03	5.198
11-1-2-60	3.46	17.073	6.354
11-1-2-61	3.844	14.174	6.561
11-1-2-63	4.514	12.789	6.153
11-1-2-64	4.746	17.094	6.629
11-1-2-65	4.4	13.245	6.283
11-1-2-67	0.445	4.134	1.541
11-1-2-68	1.298	9.207	4.109
11-1-2-69	1.946	13.727	6.208
11-1-2-70	0.727	9.368	1.945
11-1-2-71	2.001	8.275	3.179
11-1-2-72	4.111	9.18	8.03
11-1-2-74	3.265	11.346	6.331
11-1-2-75	1.997	9.919	5.321
11-1-2-76	2.35	11.711	4.07
11-1-2-77	2.936	13.4	5.736
11-1-2-78	3.832	14.792	5.928
11-1-2-79	1.52	7.447	3.089
11-1-2-80	4.271	14.468	6.698
11-1-3-1	3.994	13.734	6.713
11-1-3-4	2.944	8.934	4.143
11-1-3-5	3.271	12.378	6.083
11-1-3-6	4.142	12.417	6.999
11-1-3-7	3.285	10.95	6.546
11-1-3-8	3.721	16.373	6.717
11-1-3-9	4.511	16.683	7.193
11-1-3-10	4.652	15.112	7.157
11-1-3-11	2.856	8.189	3.702
11-1-3-12	3.736	9.683	4.54
11-1-3-13	4.699	15.554	7.015
11-1-3-14	3.168	11.499	5.199
11-1-3-15	2.146	8.552	3.208
11-1-3-16	1.946	9.561	3.731
11-1-3-17	4.675	17.001	6.506
11-1-3-18	2.9	14.588	5.501
11-1-3-19	3.661	11.936	6.103
11-1-3-21	2.611	11.521	4.637
11-1-3-22	3.778	11.508	6.418
11-1-3-23	3.042	9.667	5.329
11-1-3-24	3.754	14.36	4.991
11-1-3-25	0.454	11.628	4.017
11-1-3-26	0.662	8.189	2.57
11-1-3-27	3.223	9.736	3.621
11-1-3-28	2.215	11.922	4.067
11-1-3-30	3.96	12.982	5.199
11-1-3-31	0.911	9.97	2.76
11-1-3-32	0.89	13.506	3.933
11-1-3-33	3.675	10.554	4.053
11-1-3-34	4.065	9.808	5.466
11-1-3-36	3.863	13.242	6.107
11-1-3-37	-0.413	5.264	1.279
11-1-3-39	4.732	15.869	6.896
11-1-3-40	3.436	13.005	5.701
11-1-3-41	3.835	16.002	6.757
11-1-3-42	4.049	15.447	6.656
11-1-3-43	3.794	16.228	6.613
11-1-3-44	3.51	12.654	5.307
11-1-3-45	3.27	12.777	5.402
11-1-3-46	3.867	15.624	6.252
11-1-3-47	1.618	9.709	4.929
11-1-3-48	3.954	14.21	6.327
11-1-3-49	2.829	15.56	5.645
11-1-3-50	3.524	11.063	5.45
11-1-3-51	4.572	15.634	6.031
11-1-3-52	3.514	10.269	4.289
11-1-3-53	2.097	8.014	3.923
11-1-3-54	2.941	11.66	4.268
11-1-3-55	3.351	11.91	5.037
11-1-3-56	3.964	15.979	5.984
11-1-3-57	3.049	15.699	7.047
11-1-3-58	0.999	7.152	3.23
11-1-3-59	0.999	5.999	3.23
11-1-3-60	2.883	13.846	5.947
11-1-3-61	4.756	16.759	6.648
11-1-3-62	4.395	13.954	7.167
11-1-3-64	4.375	13.001	6.648
11-1-3-65	4.03	16.189	6.592
11-1-3-66	4.916	15.532	6.754
11-1-3-67	4.143	18.466	7.418
11-1-3-68	3.99	15.864	7.163
11-1-3-69	4.417	12.036	6.425
11-1-3-70	4.25	15.161	6.963
11-1-3-71	3.56	14.886	6.976
11-1-3-72	4.393	14.172	6.765
11-1-3-73	3.15	9.508	4.082
11-1-3-74	3.576	13.117	7.519
11-1-3-75	4.53	15.649	6.815
11-1-3-76	4.409	14.048	6.803
11-1-3-77	4.202	10.545	6.417
11-1-3-78	3.443	10.252	5.187
11-1-3-79	3.264	10.052	5.677
11-1-3-80	4.271	14.468	6.698
11-1-4-1	0.66	7.497	1.772
11-1-4-2	3.381	11.196	5.247
11-1-4-3	3.922	11.65	5.348
11-1-4-4	4.1	12.552	5.676
11-1-4-5	2.887	12.958	6.145
11-1-4-6	5.274	14.418	6.828
11-1-4-7	1.47	12.321	4.775
11-1-4-8	2.321	9.368	4.06
11-1-4-9	4.871	15.611	6.884
11-1-4-10	4.333	12.03	6.832
11-1-4-11	4.005	15.045	7.393
11-1-4-13	3.675	14.177	6.457
11-1-4-14	2.611	10.01	3.838
11-1-4-15	1.693	4.033	1.93

## Sheet: SR-12
Inclusion Number	Δ128	Δ206	Δ464
12-1-1-1	3.21767	13.892	7.75667
12-1-1-2	4.95867	14.451	7.97267
12-1-1-3	4.43767	10.799	6.60267
12-1-1-4	5.80467	10.958	8.35067
12-1-1-5	5.30367	16.321	7.56867
12-1-1-6	4.54567	16.555	6.94967
12-1-1-7	5.40767	17.722	7.80167
12-1-1-8	5.35967	18.726	8.45567
12-1-1-9	4.87367	18.574	8.43267
12-1-1-10	4.80067	19.13	8.39267
12-1-1-11	3.61067	16.196	5.99867
12-1-1-12	5.36567	16.397	7.53567
12-1-1-13	3.79867	13.96	6.36267
12-1-1-14	3.50767	12.724	5.29667
12-1-1-15	1.34367	7.33	3.90767
12-1-1-16	4.63267	17.849	7.36567
12-1-1-17	3.12167	11.636	4.79167
12-1-1-18	1.09767	7.107	4.02167
12-1-1-19	4.69767	14.5	7.98167
12-1-1-20	3.02467	11.263	5.37667
12-1-1-22	4.68467	16.706	9.14767
12-1-1-24	3.73667	12.75	5.95867
12-1-2-1	5.47967	18.171	7.80667
12-1-2-2	0.850667	6.316	1.73567
12-1-2-3	5.41167	16.901	8.22967
12-1-2-4	3.53367	12.741	5.93067
12-1-2-5	0.924667	5.379	1.93167
12-1-2-6	1.31267	7.835	3.77767
12-1-2-7	1.66367	5.302	1.94867
12-1-2-8	5.01367	18.486	7.42567
12-1-2-9	4.71667	17.069	6.96467
12-1-2-10	3.86067	13.767	6.42367
12-1-2-11	3.69867	11.773	4.94767
12-1-2-12	3.76467	15.322	6.52067
12-1-2-13	3.33967	9.52	5.44967
12-1-2-14	1.08567	7.562	2.02567
12-1-2-15	4.74467	15.295	7.49867
12-1-2-16	4.10067	14.798	7.37167
12-1-2-17	4.80867	19.303	7.46567
12-1-2-18	3.78467	12.979	6.53567
12-1-2-19	4.33767	16.604	6.64567
12-1-2-20	4.99267	13.076	7.69367
12-1-2-21	4.31667	14.348	6.88467
12-1-4-1	4.8005	18.006	7.109
12-1-4-2	3.6265	13.562	5.694
12-1-4-3	5.0905	18.764	7.922
12-1-4-4	4.7095	16.015	7.076
12-1-4-5	4.5445	17.094	6.991
12-1-4-6	4.4425	17.246	7.021
12-1-4-7	4.6015	16.856	6.957
12-1-4-8	3.2795	12.864	5.699
12-1-4-9	1.9115	8.527	3.351
12-1-4-10	1.8605	9.393	4.477
12-1-4-11	2.7775	9.696	3.951
12-1-4-12	2.5995	10.898	4.426
12-1-4-13	3.1025	13.89	5.681
12-1-4-14	4.5795	17.28	6.938
12-1-4-15	3.5885	17.26	7.669
12-1-4-16	5.0575	19.014	8.076
12-1-4-17	3.8685	15.209	7.043
12-1-4-19	4.1305	15.897	6.685
12-1-5-1	3.5865	13.343	4.904
12-1-5-2	4.5005	18.037	7.126
12-1-5-3	3.8745	16.418	6.116
12-1-5-4	3.3135	15.272	7.573
12-1-6-1	4.7915	18.018	7.157
12-1-6-2	4.6315	15.559	7.547
12-1-6-3	2.4035	9.332	5.202
12-1-6-4	3.6545	12.774	6.58
12-1-6-5	2.6145	9.557	4.466
12-1-6-6	4.8175	16.427	7.322
12-1-6-7	1.9655	9.877	5.158
12-1-6-8	4.1155	18.854	8.951
12-1-6-9	4.7905	15.214	9.176
12-1-6-10	5.0845	18.114	7.529
12-1-6-11	5.0615	16.949	7.578
12-1-6-12	3.7485	14.076	5.953
12-1-6-13	4.7655	15.011	7.124
12-1-7-1	4.835	17.65	6.7225
12-1-7-3	4.377	19.419	7.6105
12-1-8-1	4.781	18.424	6.9335
12-1-8-2	3.666	17.516	8.2345
12-1-8-4	2.084	9.036	3.1015
12-1-8-5	1.831	8.924	3.0385
12-1-8-6	3.695	13.387	5.6215
12-1-8-7	2.92	10.181	5.2675
12-1-8-8	4.332	14.396	7.7455
12-1-8-9	3.949	13.363	6.0155
12-1-8-10	4.578	12.414	6.9055
12-1-8-11	4.066	15.128	6.8805
12-1-8-12	4.496	14.068	6.1065
12-1-8-13	2.852	10.46	4.6665
12-1-8-14	3.82	14.642	6.1535
12-1-8-15	4.797	16.637	7.0435
12-1-8-16	3.607	12.925	6.0305
12-1-8-17	4.718	17.439	7.2765
12-1-8-18	2.203	8.626	3.6335
12-1-8-19	4.169	15.024	7.1555
12-1-9-1	4.3955	13.0475	7.4735
12-1-9-2	4.9945	22.0405	8.1895
12-1-9-3	4.1165	16.6315	7.3065
12-1-9-4	2.6325	16.6695	6.7905
12-1-9-5	5.0265	20.3025	8.1415
12-1-9-6	4.7025	17.4825	7.5365
12-1-9-7	2.6065	10.0485	5.3725
12-1-9-8	3.0275	8.9145	6.9225
12-1-9-9	2.1875	9.7075	4.3795
12-1-9-10	4.2405	13.8115	6.5625
12-1-9-12	4.1355	15.8365	7.0835
12-1-9-13	4.0805	15.9435	7.1985
12-1-9-14	4.0405	18.0035	6.4815
12-1-9-15	5.1615	18.8325	8.8585
12-1-9-16	4.6765	17.7515	7.2345
12-1-9-17	4.6465	17.0885	7.1535
12-1-9-18	3.4255	13.5005	6.2545
12-1-9-19	2.5335	12.6035	5.3305
12-1-9-20	4.3845	14.7685	7.9025
12-1-9-21	4.1635	15.6575	7.0315
12-1-10-1	3.8595	15.0445	6.0475
12-1-10-2	4.8275	18.2545	8.2255
12-1-10-3	5.0295	20.1475	7.5805
12-1-10-4	2.8235	10.6865	4.9015
12-1-10-7	4.2675	16.6385	7.5755
12-1-10-8	4.5825	14.5265	8.3725
12-1-10-9	3.7105	11.3505	7.2875
12-1-11-1	5.0155	17.9835	7.9115
12-1-11-2	2.9445	10.6245	4.8215
12-1-11-3	3.0795	12.0045	5.3225
12-1-11-4	5.1055	20.4135	8.3095
12-1-11-5	4.7065	16.3935	7.5855
12-1-11-6	4.0275	16.5435	7.1105
12-1-11-7	5.8985	19.4155	9.0595
12-1-12-1	4.6795	17.2775	7.2795
12-1-12-2	2.7705	9.4355	6.2045
12-1-12-3	4.2995	16.8515	6.9265
12-1-12-4	2.4855	9.7135	5.9355
12-1-13-1	3.9435	16.2435	6.9635
12-1-13-2	4.8505	19.4335	7.4955
12-1-13-3	3.9995	15.0145	6.6595
12-1-13-4	2.8545	11.6115	5.0075
12-1-13-5	4.0055	16.1445	6.3635
12-1-13-6	4.1155	12.7335	6.6435
12-1-13-7	3.6555	13.4435	6.8915
12-1-13-8	5.0425	15.7415	9.1195
12-1-13-9	3.2035	15.3935	7.3025
12-1-13-10	5.0545	14.7545	7.8505
12-1-14-1	4.634	18.13	7.699
12-1-14-2	4.057	18.235	7.183
12-1-14-3	4.264	15.983	7.292
12-1-14-4	4.824	18.365	7.76
12-1-14-5	5.176	20.599	8.055
12-1-14-6	4.798	11.995	8.67
12-1-14-7	4.874	14.972	7.68
12-1-14-8	5.587	15.006	8.82
12-1-15-1	2.676	10.356	4.779
12-1-15-2	2.219	10.314	4.616
12-1-15-3	4.415	14.167	6.348
12-1-15-4	2.121	9.515	4.2
12-1-15-5	1.824	8.359	3.605
12-1-15-6	4.305	13.141	6.547
12-1-15-7	2.624	9.288	3.534
12-1-15-8	4.111	17.672	7.966
12-1-16-1	3.942	14.609	6.008
12-1-16-2	5.577	19.693	8.101
12-1-16-3	4.692	17.987	8.436
12-1-16-4	5.357	16.701	7.747
12-1-16-5	4.69	18.265	7.297
12-1-16-6	4.889	17.743	7.184
12-2-1-1	3.625	13.308	5.558
12-2-1-2	2.065	10.84	3.45
12-2-1-3	2.98	15.117	6.112
12-2-1-4	5.054	21.539	8.118
12-2-1-5	4.072	17.957	6.757
12-2-1-7	4.358	15.295	7.714
12-2-1-8	4.061	16.519	6.778
12-2-1-9	4.84	19.178	7.863
12-2-1-10	5.087	20.048	7.806
12-2-1-11	4.161	17.53	6.312
12-2-2-1	3.886	13.251	5.71
12-2-2-2	1.581	9.918	4.552
12-2-2-3	3.102	11.993	5.116
12-2-2-4	1.058	6.009	1.264
12-2-2-5	2.257	9.863	3.699
12-2-2-6	3.201	14.941	5.987
12-2-2-7	3.162	9.179	5.801
12-2-2-8	3.664	11.337	6.027
12-2-2-9	4.081	14.085	7.382
12-2-2-10	3.669	13.241	5.483
12-2-2-11	4.096	14.44	7.109
12-2-2-12	4.587	16.797	9.106
12-2-2-13	4.212	14.919	7.456
12-2-2-14	3.706	13.376	6.72
12-2-2-15	3.968	12.546	6.64
12-2-3-1	3.982	15.411	6.162
12-2-3-2	2.899	9.337	4.981
12-2-3-3	5.896	20.956	8.774
12-2-4-1	3.698	11.755	6.078
12-2-4-2	4.262	16.996	7.28
12-2-4-3	5.517	16.876	7.511
12-2-4-4	4.651	16.311	7.623
12-2-4-5	3.989	15.663	7.052
12-2-4-6	4.881	17.593	7.811
12-2-4-7	4.729	18.371	8.133
12-2-4-8	5.078	17.04	8.175
12-2-5-1	5.035	19.1965	7.947
12-2-5-2	5.026	18.0725	7.746
12-2-5-3	3.999	15.6275	6.926
12-2-5-4	2.916	11.8705	4.801
12-2-5-5	3.708	12.6695	5.909
12-2-5-6	4.007	13.3615	6.226
12-2-5-7	4.018	11.3605	6.491
12-2-5-8	4.238	13.6565	6.372
12-2-5-9	5.032	16.8735	7.701
12-2-5-10	3.242	16.2835	7.799
12-2-5-11	5.51	18.3675	8.023
12-2-5-12	4.844	16.3415	7.73
12-2-5-13	4.878	19.0025	7.692
12-2-5-14	4.115	14.5525	7.513
12-2-5-15	4.986	18.6135	6.973
12-2-5-16	5.436	14.5075	8.048
12-2-5-17	4.922	18.2585	7.937
12-2-5-18	5.688	19.4045	8.002
12-2-5-19	4.237	18.4105	7.157
12-2-6-1	4.565	16.4325	7.21
12-2-6-2	3.854	13.5485	5.338
12-2-6-3	3.854	12.5115	6.518
12-2-6-4	4.689	15.2675	6.366
12-2-7-1	5.55	18.3215	8.46
12-2-7-2	4.113	13.3135	6.667
12-2-7-3	5.118	18.0315	7.748
12-2-7-4	3.876	14.7025	7.211
12-2-7-5	4.582	15.9155	8.15
12-2-8-1	4.322	15.7255	8.15
12-2-8-2	4.16	13.6155	6.103
12-2-8-3	4.754	14.6355	7.067
12-2-8-4	4.648	13.0895	8.117
12-2-8-5	4.02	14.4765	7.008
12-2-8-6	3.668	13.3515	5.813
12-2-8-7	3.526	13.5605	6.763
12-2-8-8	3.494	14.3515	7.02

## Sheet: SR-13
Inclusion Number	Δ128	Δ206	Δ464
13-1-1-1	2.745	8.3745	3.652
13-1-1-2	-0.006	6.7455	2.531
13-1-1-3	1.249	6.7295	3.306
13-1-1-4	3.402	13.6235	5.043
13-1-1-5	3.571	14.6365	5.81
13-1-1-6	2.431	9.5475	5.087
13-1-1-7	2.263	8.5365	3.168
13-1-1-8	3.255	12.5245	5.309
13-1-1-9	4.254	17.5785	6.646
13-1-1-10	3.362	12.0995	4.969
13-1-1-11	5.613	16.8365	7.736
13-1-1-12	4.905	17.2115	7.403
13-1-1-13	4.287	17.3265	7.446
13-1-1-14	4.08	14.3065	5.807
13-1-1-15	4.389	17.1755	6.875
13-1-1-16	4.439	15.1235	6.673
13-1-1-17	3.367	13.0245	5.052
13-1-1-18	4.674	17.1795	7.404
13-1-1-19	4.221	13.3235	6.543
13-1-1-20	2.466	11.1235	4.865
13-1-1-21	1.564	8.4995	3.933
13-1-1-22	4.143	13.3875	6.694
13-1-2-1	2.603	13.8015	5.427
13-1-2-2	2.866	9.8095	5.25
13-1-2-3	2.947	9.6265	6.01
13-1-2-4	3.047	13.2175	6.201
13-1-3-1	3.844	11.384	8.307
13-1-3-2	2.644	10.978	4.961
13-1-3-3	4.004	14.681	7.115
13-1-3-4	3.849	16.013	6.733
13-1-3-5	4.83	14.497	7.312
13-1-3-6	2.815	10.272	4.571
13-1-3-8	4.487	14.43	8.05
13-1-3-9	4.649	9.673	7.899
13-1-3-10	4.909	17.177	7.619
13-1-3-11	0.907	4.342	1.476
13-1-3-12	2.511	11.159	5.252
13-1-3-13	2.707	9.999	3.861
13-1-3-14	4.017	17.012	7.902
13-1-3-15	4.1	14.948	6.513
13-1-4-1	5.04	19.832	8.232
13-1-4-2	3.528	13.381	7.379
13-1-4-4	1.826	8.35	3.55
13-1-4-5	3.55	10.132	6.176
13-1-4-6	4.834	18.224	7.385
13-1-4-7	3.104	9.9	5.482
13-1-4-8	2.976	8.735	3.899
13-1-4-9	0.958	5.678	1.806
13-1-5-1	3.57167	13.446	5.81733
13-1-5-2	1.78667	8.192	3.12833
13-1-5-3	3.71967	13.471	6.30133
13-1-5-4	2.97467	12.244	4.94733
13-1-5-5	1.78067	7.998	2.87833
13-1-5-6	1.87267	8.065	3.59133
13-1-5-7	1.48067	8.968	2.52533
13-1-5-8	3.75267	12.898	5.08133
13-1-5-9	3.77967	14.206	5.29933
13-1-5-10	3.78567	11.225	3.89033
13-1-5-11	2.91567	12.164	5.18733
13-1-6-1	4.36767	15.482	6.61833
13-1-6-2	4.72067	18.405	7.29933
13-1-6-3	5.62867	20.538	8.51833
13-1-6-4	4.69167	14.313	6.56133
13-1-6-5	4.11367	12.159	6.76833
13-1-6-6	2.95067	10.935	5.96333
13-1-6-7	1.40067	8.244	2.82533
13-1-6-9	3.58267	9.01	5.88233
13-1-6-10	1.80767	8.105	2.92933
13-1-6-11	5.37367	20.445	7.66733
13-1-6-12	1.02967	5.089	1.55933
13-1-6-13	3.70767	13.299	5.26133
13-1-6-14	3.56967	11.539	5.63933
13-1-6-15	1.90367	8.912	3.04633
13-1-6-16	4.69167	18.036	7.41033
13-1-6-17	4.65067	18.131	6.96033
13-1-6-18	2.82767	11.059	4.76333
13-1-7-1	5.48967	18.769	7.64133
13-1-7-2	4.48867	17.297	6.93233
13-1-7-3	1.67067	8.716	3.39833
13-1-7-4	4.19167	13.977	6.12733
13-1-7-5	3.75067	15.128	6.14433
13-1-7-6	4.97467	15.879	7.82833
13-1-8-1	4.16467	13.651	7.48233
13-1-8-2	2.01267	10.238	4.33333
13-1-8-3	3.80767	16.993	6.49633
13-1-8-4	5.08567	14.222	6.91833
13-1-8-5	2.08867	7.076	2.94333
13-1-8-6	3.99267	12.712	6.22933
13-1-8-7	3.73767	13.142	5.93833
13-1-8-8	5.30767	17.38	7.67333
13-1-8-9	3.03167	10.028	5.75733
13-1-8-10	4.58867	16.555	6.52433
13-1-8-11	3.82667	14.914	6.19533
13-1-8-12	4.72867	15.924	6.78733
13-1-8-13	5.53467	20.24	7.88533
13-1-8-14	5.63567	19.55	7.81833
13-1-8-15	5.56167	21.768	8.55833
13-1-8-16	4.80867	18.531	7.54233
13-1-8-17	2.69867	11.213	4.73033
13-1-8-18	3.88967	14.123	5.56733
13-1-8-19	4.54767	16.754	6.84233
13-1-8-20	3.80267	14.987	6.37833
13-1-8-21	3.47667	12.223	4.87033
13-1-8-22	4.66267	14.526	7.16333
13-1-8-23	3.67267	13.907	5.38333
13-1-8-24	3.31367	11.903	4.68833
13-1-8-25	3.30167	14.046	6.40033
13-1-9-1	5.0375	20.425	7.7225
13-1-10-1	1.8865	10.045	4.0195
13-1-10-2	1.9625	9.25	3.9495
13-1-10-3	3.6515	13.372	5.9275
13-1-10-4	4.0495	14.339	6.4405
13-1-10-5	3.7925	11.837	5.2285
13-1-10-6	3.9815	16.81	7.3705
13-1-10-7	3.6055	15.488	6.2345
13-1-11-1	2.5575	9.231	3.4145
13-1-11-2	4.5795	16.367	7.0405
13-1-11-3	4.0035	15.76	6.4635
13-1-11-4	4.2915	11.597	7.5555
13-1-11-5	1.9735	10.042	3.9225
13-1-12-1	4.1965	14.747	7.0665
13-1-12-2	3.8525	10.237	6.9025
13-1-12-3	2.8335	12.492	5.7125
13-1-12-4	2.5575	10.474	4.1195
13-1-12-5	3.8625	12.925	5.3025
13-1-12-6	4.4965	16.1	6.6105
13-1-12-7	4.5175	13.981	5.9335
13-1-12-8	2.8925	10.228	4.8955
13-1-12-9	3.4745	13.94	5.1175
13-1-12-10	2.9665	12.035	4.7715
13-1-12-11	4.0765	15.242	6.2165
13-1-12-12	3.8425	14.872	5.8265
13-1-12-13	4.5805	16.817	6.7845
13-1-13-1	3.9175	17.338	6.7205
13-1-13-2	4.6895	16.111	7.2165
13-1-13-3	4.1045	14.975	6.5605
13-1-13-5	3.8505	15.475	6.6755
13-1-13-6	1.9865	9.067	2.8395
13-1-13-7	5.3795	16.31	6.9595
13-1-14-1	2.5965	10.596	4.1435
13-1-14-2	2.7135	11.341	4.8145
13-1-14-3	3.9135	16.791	6.8415
13-1-14-4	4.5995	16.433	6.8685
13-1-14-5	3.9165	15.851	6.8105
13-1-14-6	3.7525	16.838	5.7575
13-1-14-7	1.6775	8.334	2.9045
13-1-14-8	3.7695	13.838	6.1135
13-1-14-9	4.4695	16.199	7.4155
13-1-14-10	3.4925	13.323	5.4785
13-1-14-11	3.5055	13.212	5.2745
13-1-14-12	3.7525	12.644	5.6945
13-1-14-13	4.1505	14.146	5.0975
13-1-14-14	2.6465	10.306	4.0865
13-1-14-15	3.2625	11.659	5.0355
13-1-14-16	2.6895	10.039	4.0805
13-1-14-17	2.7335	10.535	4.8235
13-1-15-1	3.9925	13.162	5.4295
13-1-15-2	5.3705	18.096	7.7695
13-1-15-3	4.4915	15.44	6.6725
13-1-15-4	4.9865	18.069	7.8295
13-1-15-5	3.7515	12.858	6.1175
13-1-15-6	1.1855	7.822	3.9665
13-1-15-7	4.7685	15.906	6.9475
13-1-15-8	5.1975	16.696	7.6955
13-1-15-9	3.8745	16.422	6.5445
13-1-15-10	4.0855	14.141	6.5875
13-1-15-11	4.5465	15.915	7.3475
13-1-15-12	4.4295	17.419	6.7115
13-1-15-13	3.7655	12.364	5.6555
13-1-15-14	1.9835	8.303	3.1075
13-1-15-15	1.2955	7.893	2.2265
13-1-15-16	3.9665	11.605	6.9315
13-1-15-17	3.7645	13.135	6.5625
13-1-15-18	4.5415	14.392	7.7325
13-1-15-19	4.6955	18.331	7.3595
13-1-15-20	3.9135	14.145	5.7075
13-1-15-21	4.8775	18.095	7.4525
13-1-15-22	4.7715	18.077	7.7895
13-1-15-23	5.5635	18.256	7.9385
13-1-15-24	3.7435	11.755	6.3805
13-1-15-25	3.8795	15.393	6.0935
13-1-15-26	4.5835	17.138	7.3515
13-1-15-27	3.8385	15.885	5.8235
13-1-15-28	4.7205	16.747	7.6605
13-1-15-29	4.6425	16.655	6.9765
13-1-15-30	4.6955	16.21	6.9185
13-1-15-31	4.8725	17.178	7.1085
13-1-15-32	3.6575	12.484	5.7865
13-1-16-1	1.1355	6.075	2.6775
13-1-16-2	1.7845	7.979	3.1725
13-1-16-3	2.6925	11.114	4.9715
13-1-16-4	4.7485	16.292	6.8045
13-1-16-5	3.5895	11.132	4.8855
13-1-16-6	3.0005	9.549	4.5975
13-1-16-7	1.4845	7.571	2.4715
13-1-16-8	3.6405	12.073	6.1175
13-1-16-9	4.8485	17.703	7.6355
13-1-16-10	3.8245	13.742	5.6115
13-1-16-11	4.0965	15.079	6.6935
13-1-16-12	4.4295	15.614	7.5375
13-1-16-13	4.2455	15.064	7.5655
13-1-16-14	2.6875	10.017	4.1505
13-2-1-1	5.7895	23.031	8.979
13-2-1-2	5.7875	14.787	8.432
13-2-1-3	4.3255	16.094	7.804
13-2-1-4	2.7395	11.037	5.592
13-2-1-5	5.0245	18.021	7.696
13-2-1-6	3.9645	13.667	6.202
13-2-1-7	3.9805	15.193	6.809
13-2-1-8	2.2285	8.32	3.511
13-2-1-9	4.7295	16.656	7.222
13-2-2-1	3.5975	13.46	4.851
13-2-2-2	3.8775	14.638	7.021
13-2-2-3	5.4455	19.347	8.073
13-2-2-4	2.0065	9.576	4.387
13-2-2-5	4.7845	19.089	7.18
13-2-2-6	4.6375	17.833	7.152
13-2-2-7	5.1825	14.01	7.589
13-2-2-8	3.6915	13.493	5.474
13-2-2-9	4.9295	17.995	7.339
13-2-3-1	4.7395	15.27	6.994
13-2-3-2	2.9075	11.347	5.219
13-2-3-3	2.6355	7.73	3.407
13-2-3-4	1.8145	8.125	3.385
13-2-3-5	4.0645	16.36	7.807
13-2-3-6	3.8245	15.501	6.323
13-2-3-7	4.1025	13.238	7.634
13-2-3-8	4.5765	17.434	7.633
13-2-3-9	2.4255	9.484	3.498
13-2-3-10	4.7825	15.012	7.321
13-2-3-11	3.0995	11.159	5.913
13-2-3-12	2.0305	8.07	3.084
13-2-3-13	4.6955	15.258	6.765
13-2-3-14	3.9725	15.599	6.245
13-2-3-15	3.5315	12.944	6.902
13-2-3-16	2.6075	9.688	4.954
13-2-3-17	4.0415	14.821	7.848
13-2-3-18	2.6855	10.344	4.372
13-2-3-19	2.3465	10.229	4.147
13-2-3-20	1.7925	8.363	3.462
13-2-3-21	3.5935	12.562	6.105
13-2-3-22	1.7065	6.385	3.234
13-2-3-23	3.4615	12.32	5.275
13-2-3-24	4.6115	13.519	7.189
13-2-3-25	5.5475	19.444	7.867
13-2-3-26	3.5655	12.051	6.721

## Sheet: SR-18
Inclusion Number	Δ128	Δ206	Δ464
18-1-1-1	4.9815	15.803	7.7835
18-1-2-1	2.9675	10.492	4.1255
18-1-2-2	1.5115	8.712	2.4565
18-1-2-3	4.0905	15.487	7.0255
18-1-2-4	4.0485	14.147	6.1955
18-1-2-5	3.1915	10.097	4.7735
18-1-2-6	1.7355	8.107	2.9115
18-1-2-7	3.7605	13.793	5.9365
18-1-2-8	2.1715	8.414	3.8095
18-1-3-1	4.5745	16.144	6.0865
18-1-3-2	3.5925	12.262	5.0285
18-1-3-3	2.7335	11.041	3.9835
18-1-4-1	4.2935	12.972	7.2005
18-1-5-1	1.5705	6.559	2.5715
18-1-5-2	3.3325	11.712	6.1855
18-1-6-1	3.3145	10.539	5.6215
18-1-6-2	3.4715	12.327	4.8525
18-1-6-3	3.0525	10.317	3.9385
18-1-6-4	5.5915	19.765	8.5455
18-1-7-1	4.3755	13.131	6.5075
18-1-7-2	4.6575	13.807	6.5795
18-1-7-3	2.8285	10.843	3.4795
18-1-7-4	2.5865	11.252	5.4775
18-1-7-5	4.3005	11.8	7.2475
18-1-7-6	0.8745	6.253	1.5235
18-1-7-7	3.2215	12.125	5.6675
18-1-7-8	3.0215	13.889	6.1845
18-1-8-1	3.862	14.2495	6.6115
18-1-8-3	1.854	7.9325	2.7655
18-1-8-4	1.905	7.1655	2.6795
18-1-8-5	1.792	8.5045	2.9605
18-1-8-6	1.803	10.0035	3.8065
18-1-11-1	1.457	8.8565	2.3495
18-1-11-2	2.977	11.5165	4.2845
18-1-11-3	1.575	9.0965	2.7085
18-1-11-4	2.668	9.1245	4.7995
18-1-11-5	5.217	18.1555	7.6165
18-1-11-6	4.456	16.5355	6.5225
18-1-11-7	1.393	6.3245	1.5145
18-1-11-8	3.602	11.9845	6.6245
18-1-11-9	4.113	17.6825	7.3175
18-1-11-10	5.031	18.8285	8.3295
18-1-11-11	4.71	15.1255	6.9905
18-1-11-12	3.665	10.1475	5.1885
18-1-11-13	4.729	16.5915	7.0055
18-1-11-14	4.76	17.2665	7.2575
18-1-12-1	4.621	15.2085	6.5835
18-1-12-2	4.3	12.6215	6.5725
18-1-12-3	4.796	18.1175	8.5455
18-1-12-4	5.339	17.1235	7.5575
18-1-13-1	2.511	9.379	3.715
18-1-13-2	2.267	10.8	4.918
18-1-14-1	0.735	7.99	1.223
18-1-14-2	0.643	5.805	1.227
18-1-14-3	3.299	11.206	5.477
18-1-14-4	4.69	14.942	6.443
18-1-14-5	1.396	9.049	1.867
18-1-14-6	3.385	11.678	5.866
18-1-14-7	0.744	7.198	1.955
18-1-15-1	4.76	18.518	7.486
18-1-15-2	4.126	13.453	5.998
18-1-15-3	4.024	14.758	5.973
18-1-16-1	2.1	8.881	4.953
18-1-16-2	3.647	14.645	6.122
18-1-16-3	4.383	13.264	6.102
18-1-16-4	5.105	14.879	7.037
18-1-16-5	4.28	13.996	6.246
18-1-17-1	1.189	8.015	2.8095
18-1-18-1	1.638	7.357	3.0495
18-1-18-2	1.65	10.208	4.1315
18-1-18-3	2.557	10.986	5.3155
18-1-18-4	1.956	8.119	3.1325
18-1-18-5	2.38	11.533	6.4095
18-1-18-6	4.665	17.213	7.2235
18-1-18-7	2.274	10.054	4.8835
18-2-1-1	3.794	14.866	5.9225
18-2-1-2	2.521	10.318	4.2385
18-2-1-3	2.104	9.33	3.4005
18-2-1-4	0.667	6.953	2.5925
18-2-2-1	3.683	12.557	5.5935
18-2-2-2	3.193	13.054	5.9655
18-2-2-3	1.114	7.521	2.5685
18-2-2-4	3.661	10.956	5.8015
18-2-2-5	0.276	4.479	1.3105
18-2-3-1	3.045	10.163	4.2095
18-2-3-2	3.893	13.883	6.4075
18-2-4-1	3.907	14.425	7.1055
18-2-4-2	4.11	15.089	7.1475
18-2-4-3	3.56	13.562	6.5305
18-2-4-4	3.575	11.007	6.8715
18-2-4-5	2.735	9.524	3.7805
18-2-4-6	1.549	7.899	3.5515
18-2-4-7	2.345	10.629	5.4295
18-2-4-8	2.006	9.471	3.6595
18-2-4-9	2.343	10.568	5.0125
18-2-4-10	3.928	11.361	6.8925
18-2-4-11	4.863	20.231	8.0365
18-2-4-12	1.249	7.244	2.9155
18-2-4-13	1.121	7.44	3.1275
18-2-4-14	1.023	8.249	2.6425
18-2-4-15	1.173	6.672	1.6545
18-2-4-16	1.048	5.38	1.7435
18-2-5-1	3.418	12.245	6.1805
18-2-5-2	4.853	18.746	7.9865
18-2-5-3	2.799	12.922	5.6315
18-2-5-4	3.938	14.809	6.6155
18-2-5-5	3.895	14.536	6.3525
18-2-5-6	1.124	7.46	2.1095
18-2-6-1	0.946	5.81	2.0365
18-3-1-1	3.9585	14.3905	6.9005
18-3-1-2	3.8965	14.9795	5.8255
18-3-1-3	2.6515	10.9645	4.4435
18-3-1-4	3.8065	14.0265	5.9155
18-3-1-5	1.3865	6.2895	1.6025
18-3-1-6	4.9745	19.6755	7.9475
18-3-1-7	2.9415	11.2525	3.8225
18-3-1-8	3.9155	16.3055	6.7705
18-3-1-9	3.0385	12.1805	4.7505
18-3-1-10	4.3305	17.1005	6.9185
18-3-1-11	0.8305	5.4975	1.6635
18-3-1-12	2.1495	10.0725	3.4865
18-3-2-1	1.6385	7.5595	2.5755
18-3-2-2	1.1615	6.4015	1.9635
18-3-2-3	1.5505	7.2995	1.9865
18-3-2-4	0.5645	8.6885	2.4685
18-3-2-5	1.8345	9.2255	3.4495
18-3-2-6	1.4575	7.3125	2.3495
18-3-2-7	1.7615	6.5565	2.8205
18-3-2-8	1.5425	7.9315	2.9785
18-3-2-9	1.9955	10.1675	3.8205
18-3-3-1	1.1645	6.5645	2.2285
18-3-3-2	1.1655	7.3015	2.4615
18-3-3-3	1.5965	9.4605	5.2765
18-3-4-1	3.6625	14.3465	5.7035
18-3-4-2	2.5425	10.0995	4.6335
18-3-4-3	0.8495	7.3365	2.1335
18-3-4-4	3.8975	14.3615	6.7025
18-3-4-5	2.8605	11.3525	3.9265
18-3-4-6	2.8085	10.7705	5.2815
18-3-4-7	2.7735	10.1695	5.6225
18-3-4-8	4.7675	16.4215	7.0705
18-3-4-9	3.1605	12.3525	5.1995
18-3-4-10	1.9575	8.7545	3.2845
18-3-4-11	2.7615	11.4225	5.2895
18-3-4-12	3.6985	16.1665	6.1605
18-3-4-13	2.2655	11.7725	4.3615
18-3-4-14	0.5545	6.2405	-0.1765
18-3-4-15	4.5775	17.3685	6.3265
18-3-4-16	2.2845	9.8305	3.9135
18-3-4-17	1.1145	7.3085	2.3775
18-3-5-1	1.9185	8.7965	3.4435
18-3-5-2	4.4735	14.8615	6.9895
18-3-5-3	5.5505	18.7855	8.0175
18-3-5-4	1.0555	7.3305	2.2865
18-3-5-5	1.8315	8.4485	3.1875
18-3-5-6	3.4455	12.7715	5.4575
18-3-6-1	3.9945	13.3145	6.9735
18-3-6-2	4.2505	14.2925	7.1855
18-3-6-3	1.9605	9.4895	3.5515
18-3-6-4	2.9705	9.1105	4.2985
18-3-7-1	4.801	19.342	7.526
18-3-7-2	3.807	14.899	5.865
18-3-7-3	2.692	9.374	4.138
18-3-7-4	1.815	8.35	3.292
18-3-7-5	3.259	13.108	5.863
18-3-7-6	2.188	8.996	3.417
18-3-7-7	4.139	14.861	6.556
18-3-7-8	3.954	15.414	6.588
18-3-8-1	4.668	16.317	6.622
18-3-8-2	3.825	15.319	6.013
18-3-8-3	1.108	8.436	3.287
18-3-8-4	4.641	15.487	6.824
18-3-9-1	0.438	8.059	1.862
18-3-9-2	1.286	7.777	2.316
18-3-10-1	1.475	8.066	2.418
18-3-10-2	0.217	4.605	0.913
18-3-10-3	1.653	14.785	2.411
18-3-10-4	2.92	12.19	4.94
18-3-10-5	0.985	7.551	3.57
18-3-10-6	0.308	8.37	2.47
18-3-10-7	1.319	7.946	2.746
18-3-10-8	1.066	8.055	1.985
18-3-10-9	1.779	9.139	3.242
18-3-10-10	1.627	4.912	1.951
18-4-1-1	0.787	4.542	1.555
18-4-1-2	3.929	14.338	6.236
18-4-1-3	1.416	8.514	5.037
18-4-1-4	0.284	7.014	1.395
18-4-2-1	5.122	20.054	7.943
18-4-2-2	2.308	8.544	4.038
18-4-2-3	2.926	9.576	6.14
18-4-2-4	1.878	8.311	4.907
18-4-2-5	0.67	7.571	2.181
18-4-2-6	1.523	6.95	2.011
18-4-2-7	3.271	13.727	5.642
18-4-2-8	0.878	6.361	1.65
18-4-2-9	3.231	13.504	5.172
18-4-3-1	4.481	14.927	6.907
18-4-3-2	3.915	15.895	6.489
18-4-3-3	4.479	15.951	7.012
18-4-3-4	4.043	12.818	6.799
18-4-3-5	2.198	9.163	4.933
18-4-3-6	3.681	12.674	5.791
18-4-3-7	3.921	16.259	6.711
18-4-3-8	3.62	13.047	5.894
18-4-4-1	2.953	10.089	3.612
18-4-4-2	4.787	14.744	6.575
18-4-4-3	4.652	16.752	7.039
18-4-4-4	2.34	11.044	4.799
18-4-4-5	1.761	10.128	4.811
18-4-6-1	0.899	5.573	2.3395
18-4-6-2	2.298	8.907	3.5265
18-4-6-3	3.484	11.638	5.3075
18-4-6-4	3.13	10.22	4.7925
18-4-6-5	3.873	13.047	6.3425
18-4-7-1	3.599	11.839	5.1965
18-4-7-2	2	8.2	3.5495
18-4-7-3	0.999	7.501	3.2995
18-4-8-1	2.778	12.953	4.8885
18-4-8-2	3.571	12.814	6.2155
18-4-8-3	1.655	6.981	3.1595
18-4-8-4	3.285	11.881	6.5005
18-4-8-5	2.974	11.107	4.6285
18-4-9-1	2.807	10.767	4.7345
18-4-9-2	3.557	14.844	5.7475
18-4-9-3	2.075	15.377	2.8545
18-4-9-4	1.83	7.732	3.3915
18-4-9-5	1.762	6.913	3.4405
18-4-9-6	0.985	6.814	2.1895
18-4-10-1	1.03	6.976	2.5805
18-4-10-2	0.283	5.626	1.9555
18-4-10-3	1.97	7.169	3.4525
18-4-10-4	2.648	8.825	5.1545
18-4-10-5	0.259	5.961	2.0395
18-4-10-6	1.999	9.566	3.9095
18-4-10-7	1.688	7.46	3.4165
18-4-11-1	3.861	16.246	6.5845
18-4-11-2	2.74	10.895	5.2075
18-4-11-3	1.698	7.082	2.8145
18-4-11-4	1.826	8.597	3.4945
18-4-11-5	1.333	7.12	2.8645
18-4-11-6	3.052	12.254	4.9595
18-4-12-1	3.261	13.264	7.8465
18-4-12-2	0.762	8.211	2.3065
18-4-13-1	2.803	11.076	4.5775
18-4-13-2	1.634	6.646	2.8275
18-4-13-3	2.046	9.688	3.8945
18-4-13-4	1.596	6.809	3.2245

## Sheet: SR-21
Inclusion Number	Δ128	Δ206	Δ464
21-3-1	4.4165	15.4625	8.597
21-3-2	4.8265	18.1115	8.831
21-3-3	5.7155	16.4635	8.028
21-3-4	4.7915	19.3575	7.175
21-3-5	4.8795	17.0805	7.814
21-3-6	5.2635	17.8675	7.906
21-3-7	5.0525	19.9555	7.932
21-3-8	5.4555	17.9055	8.099
21-3-9	5.6345	20.6335	7.479
21-3-10	4.8845	19.3755	7.814
21-3-11	5.0275	19.6625	7.822
21-3-12	5.0755	19.1415	8.166
21-3-13	5.2175	18.2605	7.914
21-3-14	4.5755	16.7125	7.047
21-3-15	4.8805	17.8885	7.284
21-3-16	5.2325	20.5115	7.921
21-3-17	5.1015	17.1075	7.908
21-4-1	5.2385	18.5365	7.902
21-4-2	5.1005	13.2255	7.832
21-4-3	4.9115	18.2925	7.223
21-4-4	5.1765	16.3415	8.304
21-4-5	4.5255	16.1865	7.617
21-4-6	3.8195	12.5725	5.225
21-4-7	4.4885	15.6995	8.219
21-4-8	4.9155	18.5905	8.191
21-4-9	4.9515	16.6265	7.887
21-4-10	5.1775	16.9265	7.796
21-4-11	5.5825	19.5005	8.311
21-5-1	3.5245	13.4565	6.839
21-5-2	3.9235	14.3315	5.308
21-5-3	3.9185	14.3845	6.993
21-5-4	5.2825	14.5855	7.867
21-5-5	4.9435	16.9675	7.76
21-5-6	4.9735	16.5805	7.143
21-5-7	4.0515	16.4195	7.663
21-5-8	4.6415	17.8895	7.207
21-5-9	4.7625	16.6855	6.997
21-5-10	4.0635	15.8825	6.296
21-5-11	4.7985	16.6755	7.176
21-5-12	4.8845	17.9495	7.835
21-6-1	5.068	20.33	8.304
21-6-2	5.074	20.515	8.189
21-6-3	4.967	19.326	7.538
21-6-4	3.947	14.319	5.859
21-6-5	4.65	15.154	6.794
21-6-6	4.977	16.199	7.466
21-6-7	4.926	19.015	7.855
21-6-8	4.402	17.486	7.254
21-6-9	4.968	17.8	7.45
21-6-10	5.197	19.878	8.212
21-6-11	5.393	20.113	8.307
21-6-12	5.074	18.132	7.775

## Sheet: SR-23
Inclusion Number	Δ128	Δ206	Δ464
23-1-1-1	4.555	18.47	7.3545
23-1-1-2	3.038	11.365	5.3825
23-1-1-3	3.614	13.128	6.3495
23-1-1-4	2.287	9.965	3.9025
23-1-1-5	2.44	9.156	6.9535
23-1-1-6	0.7	7.436	2.1645
23-1-1-7	3.566	12.748	5.5955
23-1-1-8	2.46	8.875	3.7735
23-1-1-9	3.173	11.715	5.1745
23-1-1-10	4.458	13.52	6.9995
23-1-1-11	3.574	12.794	6.6975
23-1-1-12	4.08	13.353	6.5425
23-1-1-13	1.601	8.098	2.9255
23-1-1-14	3.105	11.77	5.0065
23-1-1-15	4.503	18.147	6.9305
23-1-1-16	1.754	8.678	3.9105
23-1-1-17	4.679	17.213	7.4175
23-1-1-18	3.595	13.358	6.4335
23-1-1-19	3.564	15.093	6.1565
23-1-1-20	5.38	21.515	8.4055
23-1-1-21	4.486	16.064	7.4245
23-1-1-22	3.381	11.788	5.5665
23-1-1-23	1.998	10.424	4.8605
23-1-2-1	4.8295	19.5935	7.313
23-1-2-2	3.8255	15.1125	6.493
23-1-2-3	4.8645	19.3985	7.14
23-1-2-4	4.4395	15.5625	6.845
23-1-2-5	4.0265	15.1355	6.697
23-1-2-6	4.5785	17.7245	6.823
23-1-2-7	3.6895	13.6165	6.46
23-1-2-8	4.0025	16.9335	6.68
23-1-2-9	3.4825	12.0875	5.161
23-1-2-10	4.6165	15.7415	6.709
23-1-2-11	3.4065	10.8875	5.091
23-1-2-12	2.7535	11.2795	4.56
23-1-2-13	3.7085	14.6495	6.375
23-1-2-14	4.1635	16.1065	6.465
23-1-2-15	3.7245	13.1445	6.111
23-1-2-16	2.9315	10.0135	4.883
23-1-2-17	3.7885	14.9575	5.718
23-1-2-18	3.8005	15.2165	5.78
23-1-2-19	3.7275	14.0815	4.934
23-1-2-20	5.4615	17.7765	8.63
23-1-2-21	3.5195	10.8305	5.682
23-1-2-22	4.0785	12.9895	6.184
23-1-2-23	5.5025	18.4375	7.842
23-1-2-24	5.6435	20.7905	8.091
23-1-2-25	4.9205	16.8185	7.638
23-1-2-26	5.8075	22.9935	9.313
23-1-2-27	4.9865	16.2745	7.747
23-1-2-28	4.4055	21.0855	9.123
23-1-3-1	3.982	16.2245	6.439
23-1-3-2	3.809	13.0165	6.96
23-1-5-1	1.93	12.9705	8.791
23-1-5-2	5.599	19.5665	8.762
23-1-7-1	1.929	9.5335	3.384
23-1-8-1	3.533	12.2235	5.731
23-1-8-2	4.076	14.8805	7.013
23-1-8-3	3.815	11.4345	7.551
23-1-8-4	4.036	12.7845	7.831
23-1-8-5	5.61	15.4895	8.151
23-1-8-6	1.883	8.3165	4.334
23-1-8-7	3.952	14.8035	5.865
23-1-8-8	4.988	18.6915	8.77
23-1-8-9	4.546	14.3785	7.205
23-1-8-10	3.845	13.4235	6.332
23-1-8-11	3.958	14.3005	6.052
23-1-8-12	3.568	15.7405	6.198
23-1-8-13	4.959	19.7715	7.942
23-1-8-14	2.674	9.8855	4.703
23-1-8-15	3.128	11.9485	5.312
23-1-8-16	1.927	13.2015	4.815
23-1-8-17	4.999	19.6775	7.703
23-1-8-18	3.74	12.4925	5.2
23-1-8-19	2.078	9.5085	3.489
23-1-8-20	1.039	11.5245	2.442
23-1-8-21	3.543	14.5885	6.16
23-1-10-1	5.2605	19.949	8.63
23-1-10-2	4.7255	15.625	7.565
23-1-10-3	3.7165	16.616	7.83
23-1-10-4	5.1495	18.681	7.657
23-1-11-1	1.1545	7.065	2.297
23-1-11-2	0.2845	7.784	3.399
23-1-12-1	3.9645	16.096	7.15
23-1-12-2	4.5335	15.082	6.163
23-1-12-3	4.8575	17.182	7.466
23-1-12-4	3.2685	12.766	6.403
23-1-12-5	5.0835	19.542	7.794
23-1-12-6	1.5315	8.287	2.054
23-1-13-1	3.1585	11.728	4.925
23-1-13-2	3.8885	11.539	7.484
23-1-13-3	3.9785	13.516	6.781
23-1-13-4	4.1575	12.844	6.851
23-1-13-5	1.0755	5.994	2.896
23-2-1-1	3.051	11.6325	5.0635
23-2-1-2	1.595	7.2755	2.6105
23-2-1-3	2.634	9.0225	3.8945
23-2-1-4	4.871	15.7995	7.0045
23-2-2-1	4.644	16.3045	6.9585
23-2-2-2	5.122	17.4905	7.8215
23-2-2-3	4.093	17.4575	8.4215
23-2-2-4	5.857	20.3875	9.2305
23-2-2-5	5.033	14.8265	8.6685
23-2-2-6	5.567	16.2635	9.5915
23-2-2-7	5.038	15.0935	7.8355
23-2-2-8	0.789	4.7685	1.9355
23-2-2-9	4.645	15.5995	6.9395
23-2-2-10	4.738	16.4425	7.4795
23-2-2-11	5.624	22.1585	8.6885
23-2-2-12	3.797	14.8595	7.0185
23-2-2-13	1.668	11.7045	6.7205
23-2-2-14	5.784	15.7335	7.4015
23-2-2-15	5.309	12.7485	8.3855
23-2-2-16	3.594	12.3925	5.8235
23-2-2-17	4.706	15.4715	7.6235
23-2-2-18	4.58	16.5785	7.5125
23-2-2-19	4.883	14.8795	7.9265
23-2-3-1	3.8885	13.08	6.511
23-2-3-2	4.0085	16.037	6.627
23-2-3-3	3.6005	13.328	5.966
23-2-3-4	4.4705	16.027	6.219
23-2-3-5	2.3855	10.46	5.975
23-2-3-6	3.7665	15.202	6.6
23-2-3-7	4.9355	18.635	7.703
23-2-3-8	4.7295	15.974	7.767
23-2-4-1	4.1455	17.042	6.682
23-2-4-2	4.7855	18.054	6.89
23-2-5-1	3.8175	12.432	5.82
23-2-5-2	3.5545	11.5	5.473
23-2-5-3	3.8235	12.606	5.813
23-2-5-4	4.0995	13.706	6.638
23-2-5-5	3.9015	13.457	5.937
23-2-5-6	4.9535	16.62	7.729
23-2-5-7	4.7835	13.237	6.732
23-2-5-8	3.7395	15.27	7.007
23-2-5-9	4.6035	13.183	6.779
23-2-6-1	3.8835	13.063	5.832
23-2-6-2	3.7345	12.912	5.739
23-2-6-3	4.0705	14.481	7.343
23-2-6-4	3.0805	10.821	4.799
23-2-6-5	3.5455	11.562	4.771
23-2-6-6	2.8725	10.236	3.949
23-2-6-7	4.9505	14.195	7.432
23-2-6-8	5.6635	17.734	8.112
23-2-6-9	2.9315	10.687	5.117
23-2-6-10	4.5545	18.078	6.855
23-2-8-1	3.0275	12.6895	6.449
23-2-8-2	4.7065	15.6715	7.24
23-2-8-3	1.0235	7.0605	1.618
23-2-8-4	1.7755	7.1275	2.353
23-2-9-1	5.7715	21.8505	8.676
23-2-9-2	4.0905	16.5065	6.799
23-2-9-3	4.6005	15.7315	7.074
23-2-9-4	5.2585	17.7165	8.019
23-2-9-5	5.7265	19.7995	9.358
23-2-11-1	3.0115	12.9015	5.535
23-2-11-2	3.7255	13.9545	5.915
23-2-11-3	5.4245	19.4075	7.663
23-2-11-5	3.8375	14.1395	6.679
23-2-11-6	3.9865	14.0775	5.962
23-2-12-1	4.7395	16.4925	6.767
23-1-12-2	2.7665	13.0815	5.186
23-2-13-1	0.9005	5.4795	1.365
23-2-13-2	4.8965	19.3605	7.524
23-2-13-3	3.8925	15.7685	6.646
23-2-13-4	0.5505	6.1195	1.258
23-2-14-1	4.6785	17.3315	6.751
23-2-14-2	1.7185	6.8175	2.78
23-2-14-3	1.9535	9.2755	4.251
23-2-14-4	3.5095	8.8895	4.82
23-2-14-5	6.0795	12.6935	5.894
23-2-14-6	4.5385	15.2855	6.35
23-2-14-7	1.8365	7.8825	3.223
23-2-14-8	4.7615	19.3845	6.979
23-2-14-9	2.7385	11.6955	4.652
23-2-14-10	4.9615	18.1895	7.452
23-2-14-11	3.5965	11.2195	5.062
23-2-14-12	0.5525	6.8105	1.983
23-2-14-13	3.7805	13.0935	6.745
23-2-15-1	5.66	21.111	8.3285
23-2-15-2	3.371	16.427	5.6635
23-2-15-3	3.777	12.913	6.1605
23-2-15-4	2.696	9.301	4.2515
23-2-15-5	2.713	10.728	4.5805
23-2-15-6	3.004	11.52	5.0695
23-2-15-7	1.617	9.197	3.5805
23-2-18-1	3.907	13.329	7.4025
23-2-18-2	2.739	11.359	4.7045
23-2-20-1	4.196	15.925	6.7265
23-2-20-2	3.949	15.584	6.5525
23-2-20-3	5.688	22.82	8.5855
23-2-20-4	5.733	20.273	8.4235
23-2-20-5	5.603	21.332	8.2515
23-2-20-6	4.916	18.473	7.4665
23-2-20-7	4.773	15.106	7.8975
23-2-20-8	4.967	18.711	7.7835
23-2-20-9	1.35	8.504	2.5905
23-2-20-10	5.096	16.327	7.5575
23-2-21-1	4.4925	17.468	6.5545
23-2-21-2	3.8075	13.395	5.5585
23-2-21-3	4.5645	18.062	6.7305
23-2-21-4	5.4085	19.323	7.8575
23-2-21-5	5.6295	18.796	7.7945
23-2-21-6	4.3115	15.765	7.5155
23-2-21-7	4.6935	14.667	6.7425
23-2-22-1	4.5775	15.181	6.5825
23-2-22-2	4.8795	21.051	7.7865
23-2-22-3	5.8285	18.119	7.8265
23-2-22-4	3.6805	17.048	6.9025
23-2-22-5	3.5725	13.155	5.0245
23-2-22-6	3.5945	12.87	5.3935
23-2-22-7	5.3665	20.039	7.7765
23-2-22-8	1.1575	6.155	1.2805
23-2-22-9	5.6165	17.065	7.8285
23-2-23-1	5.2345	16.688	8.2125
23-2-23-2	6.4565	23.806	9.4235
23-2-23-3	6.5295	17.205	8.8095
23-2-23-4	5.4675	17.349	7.5505
23-2-23-5	4.6515	15.209	6.5725
23-2-23-6	5.3275	16.503	7.4455
23-2-23-7	4.0885	12.766	6.7375
23-2-23-8	4.7015	17.763	6.7975
23-2-23-9	5.3625	17.452	7.5315
23-2-23-10	5.4135	19.987	7.7845
23-2-23-11	5.5755	18.203	7.4035
23-2-23-12	4.8645	16.144	7.4935
23-2-23-13	4.8605	17.865	7.3985
23-2-23-14	3.5875	10.188	4.2865
23-2-23-15	5.0675	19.85	7.6975
23-2-23-16	5.5335	20.752	7.9885
23-2-23-17	3.4175	12.009	4.8745
23-2-23-18	4.5645	16.337	6.7225
23-2-23-19	3.9465	12.808	5.7725
23-2-23-20	4.4935	15.657	5.7555
23-2-23-21	1.6675	8.22	2.1885
23-3-1-1	0.062	5.044	1.679
23-3-1-2	3.691	14.725	6.149
23-3-1-3	0.216	5.196	1.681
23-3-1-4	0.98	6.09	1.954
23-3-3-1	3.863	13.529	6.397
23-3-3-2	4.315	19.333	7.409
23-3-3-3	4.027	17.033	6.966
23-3-3-4	4.158	19.429	7.217
23-3-3-5	3.268	14.597	6.408
23-3-3-6	3.662	15.608	6.326
23-3-3-7	3.1585	11.7325	5.5565
23-3-3-8	3.2485	13.4165	5.3785
23-3-3-9	4.3465	16.7195	6.6665
23-3-4-1	1.0745	6.1835	2.6445
23-3-4-2	4.1055	14.5465	6.4835
23-3-4-3	2.9205	8.2925	5.1835
23-3-4-4	3.4275	15.6315	5.7605
23-3-4-5	4.6135	18.6675	7.3265

## Sheet: SR-26
Inclusion Number	Δ128	Δ206	Δ464
26-1-1-1	4.396	14.039	6.093
26-1-1-2	3.11	17.689	7.428
26-1-2-1	4.306	16.977	6.656
26-1-2-2	4.294	18.429	6.811
26-1-2-3	3.893	16.603	6.672
26-1-3-1	3.309	11.959	5.492
26-1-3-2	4.3	17.013	7.385
26-1-3-3	3.557	15.397	5.836
26-1-3-4	4.167	16.563	6.066
26-1-5-1	4.266	16.422	6.588
26-1-5-2	4.44	18.254	6.95
26-1-5-3	3.534	14.336	6.133
26-1-5-4	3.735	16.458	6.552
26-1-5-5	4.453	18.23	6.65
26-1-5-6	3.678	17.351	6.796
26-1-5-7	4.593	18.189	7.269
26-1-7-1	4.504	17.494	6.779
26-1-7-2	4.26	18.253	6.84
26-1-7-3	4.7	16.628	6.884
26-1-9-1	3.857	14.84	6.158
26-1-9-2	5.048	19.308	6.981
26-1-10-1	4.548	17.423	6.652
26-1-11-1	3.974	15.809	5.925
26-1-11-2	4.44	15.846	5.934
26-1-11-3	4.703	16.638	6.93
26-1-11-4	4.978	18.849	6.97
26-1-11-5	4.648	17.444	7.275
26-1-12-1	4.648	17.444	7.275
26-1-12-2	3.748	14.731	5.664
26-1-16-2	3.845	13.105	6.831
26-1-16-3	3.067	10.002	4.324
26-1-16-4	3.296	11.304	4.848
26-2-1-1	4.485	16.5015	6.7775
26-2-1-2	4.547	17.7225	6.7625
26-2-1-3	5.534	19.8375	8.0705
26-2-1-4	5.044	20.4215	7.6205
26-2-1-5	3.63	15.3755	6.2545
26-2-1-6	5.67	22.1005	8.6355
26-2-1-7	4.711	17.8555	6.7755
26-2-1-8	5.515	17.8005	7.8805
26-2-1-10	4.74	19.6325	7.8735
26-2-1-11	4.809	18.4275	6.9235
26-2-1-12	4.626	18.1495	6.8685
26-2-2-1	3.738	15.3965	5.9395
26-2-2-2	4.651	17.8865	6.8055
26-2-3-1	4.643	18.2085	6.9705
26-2-3-2	4.714	17.0775	7.2245
26-2-3-3	5.546	22.3905	8.6215
26-2-3-6	3.815	15.5435	6.8005
26-2-3-7	3.648	11.5855	4.9095
26-2-4-1	4.635	18.2135	6.8455
26-2-4-2	4.712	14.2345	7.1865
26-2-6-1	4.4115	17.4025	6.639
26-2-7-1	4.6405	17.3705	6.642
26-2-7-2	4.7075	15.7945	7.273
26-2-7-3	4.8555	16.8695	7.041
26-2-7-4	4.5655	16.6665	6.989
26-2-7-5	4.2505	15.0855	6.864
26-2-7-6	3.6085	15.5625	6.008
26-2-7-7	3.9855	17.6265	6.954
26-2-7-8	4.5025	16.4445	6.117
26-2-7-9	4.7085	17.1815	6.477
26-2-7-10	4.7835	13.8885	5.959
26-2-7-11	3.7805	12.1815	5.881
26-2-9-1	5.0155	19.2685	7.36
26-2-9-2	3.8735	14.5165	5.698
26-2-9-3	4.5475	17.1395	6.637
26-2-9-4	3.9985	14.6675	6.004
26-2-9-5	4.3525	14.4285	7.345
26-2-11-1	3.7135	14.9275	5.733
26-2-11-2	4.9875	13.9545	5.831
26-2-11-3	4.0905	17.1505	6.295
26-2-11-4	4.9015	18.7745	7.001
26-2-11-5	3.9425	16.1095	5.932
26-2-11-6	3.6785	15.2455	5.733
26-2-11-8	4.8785	17.4685	7.2
26-2-11-9	5.5015	18.7765	7.85
26-2-11-10	3.8175	14.9085	5.72
26-2-12-2	4.5635	13.7435	5.639
26-2-12-3	3.7675	14.5995	5.755
26-2-12-4	4.6855	15.7805	7.196
26-2-12-5	4.5575	14.7195	7.178
26-2-13-1	4.8505	19.3765	7.508
26-2-13-2	4.7075	17.9445	6.791
26-2-13-3	4.6715	16.5505	7.305
26-2-13-4	3.6005	14.4615	6.952
26-2-13-5	3.8075	14.7935	5.998
26-2-13-6	4.5735	16.5075	6.592
26-2-13-7	3.1585	12.8655	4.976
26-2-13-8	4.8245	17.4645	6.707
26-2-14-1	4.0345	15.6375	6.058
26-2-15-1	3.7565	13.7725	5.116
26-2-15-2	2.8385	11.9575	4.854
26-2-15-3	3.7395	14.0625	5.211
26-3-1-1	4.3105	17.1345	6.8155
26-3-1-2	3.5235	15.8355	6.2415
26-3-1-3	4.3585	18.6135	7.2985
26-3-1-4	3.3315	15.4465	6.3885
26-3-2-1	3.5595	15.4915	5.8595
26-3-2-3	4.4685	16.8105	7.0695
26-3-2-4	4.1545	14.7645	5.9915
26-3-4-1	3.9455	16.6135	6.5185
26-3-5-1	4.4105	17.2825	6.7145
26-3-5-2	4.2985	17.0635	6.7055
26-3-5-3	4.1215	17.5515	6.7345
26-3-5-4	4.2915	18.0005	6.6385
26-3-5-5	4.3675	16.3265	6.6105
26-3-5-6	4.3365	13.1095	6.8305
26-3-6-1	4.4315	18.8455	6.9135
26-3-6-2	4.0575	17.0435	6.7685
26-3-7-1	4.0695	15.9705	6.6775
26-3-7-2	4.0765	16.8165	6.7885
26-3-8-1	4.1455	17.4155	6.6205
26-3-8-2	4.0575	16.4885	6.4585
26-3-8-3	3.3715	14.7725	5.8635
26-3-11-1	3.0595	15.4915	5.5635
26-3-11-2	3.3105	15.7995	6.1835
26-3-11-3	3.4215	16.4755	6.5505
26-3-11-4	4.1605	16.7405	6.0905
26-3-13-1	4.0925	16.0765	6.8205
26-3-13-2	5.0245	16.3495	7.3805
26-3-13-3	4.6315	19.2855	7.3165
26-3-13-4	4.8475	14.0875	7.5735
26-3-14-1	4.9925	20.1355	7.4985
26-3-14-2	4.0955	17.0245	6.4715
26-3-14-3	4.5505	17.2815	6.6435
26-3-14-5	4.4195	16.6935	7.3565
26-3-14-7	3.2865	12.2945	6.0865
26-3-15-1	4.1895	17.6255	6.7035
26-3-15-2	3.9995	15.3625	6.1975
26-3-15-3	4.9555	18.1465	6.9915
26-3-15-4	5.1985	13.5875	7.5305
26-3-15-5	3.4865	15.2385	5.9595
26-3-16-2	4.3275	16.2855	6.7305
26-3-16-3	2.3685	10.7235	5.5975
26-3-17-1	3.8785	18.1425	6.6515
26-3-18-1	3.2095	17.8895	7.1215
26-3-18-2	4.4055	18.6635	8.4375
26-3-19-2	4.2915	17.2965	6.5305
26-3-19-3	4.2875	14.0935	6.7445
26-3-19-4	2.5615	13.1385	4.7915
26-4-1-1	3.8075	15.124	5.7585
26-4-2-1	3.9465	17.067	6.6685
26-4-2-2	4.6785	16.752	6.6705
26-4-2-3	4.3655	18.157	6.8385
26-4-2-4	4.7075	18.726	6.7465
26-4-2-5	4.6895	17.257	7.1315
26-4-2-6	3.8925	15.811	6.8385
26-4-3-1	3.9095	15.187	5.7095
26-4-3-2	2.0985	10.829	4.0175
26-4-3-3	4.1735	15.362	5.9155
26-4-3-4	4.5235	18.853	7.2605
26-4-3-5	5.1065	14.39	7.5345
26-4-3-6	3.9425	16.129	6.5485
26-4-4-1	2.9105	11.268	4.2055
26-4-4-2	3.8725	12.591	4.9135
26-4-4-3	4.7065	15.123	6.5915
26-4-4-4	3.5485	15.965	6.5995
26-4-4-5	4.1375	19.673	6.8685
26-4-4-6	3.8105	12.644	4.9815
26-4-5-1	4.7435	18.291	6.8695
26-4-5-2	4.5435	16.804	6.7535
26-4-6-1	4.8085	17.448	6.2495
26-4-6-2	3.9005	14.659	5.8225
26-4-7-1	4.6775	15.925	6.5695
26-4-7-2	4.7485	18.557	6.8335
26-4-7-3	4.6495	17.341	6.7055
26-4-7-4	5.0255	19.332	7.3575
26-4-7-5	4.6305	16.686	6.8315
26-4-7-6	4.9275	17.044	6.8445
26-4-7-7	4.6895	13.078	6.3265
26-4-8-1	4.5005	18.131	6.8175
26-4-8-2	3.9985	15.605	6.1655
26-4-9-1	5.7315	20.777	7.9845
26-4-9-2	4.6235	17.386	7.4795
26-4-9-3	3.8445	13.398	5.7345
26-4-9-4	4.2895	13.821	7.3475
26-4-9-5	6.3155	20.315	8.4385
26-4-10-1	4.7595	17.826	6.6655
26-4-10-2	5.8325	22.035	8.7465
26-4-10-3	4.7115	17.838	6.7515
26-4-11-1	4.5985	16.3345	6.096
26-4-11-2	4.6495	17.8635	7.11
26-4-11-3	3.9955	16.3675	6.709
26-4-11-4	4.0655	15.7485	6.159
26-4-12-1	3.9285	15.1475	5.926
26-4-13-1	5.0395	21.1265	7.94
26-4-13-2	4.7785	17.7455	6.869
26-4-13-3	4.0195	12.5035	6.952
26-4-13-4	4.6685	17.2385	6.758
26-4-13-5	4.6565	17.1535	6.866
26-4-13-7	4.8255	17.5545	6.528
26-5-3-1	4.0065	15.3505	5.998
26-5-3-2	4.7155	18.3755	6.853
26-5-3-3	4.1405	15.9785	7.339
26-5-4-1	4.6755	16.6735	6.77
26-5-4-2	4.6635	13.9865	6.521
26-5-4-3	4.0995	15.7545	6.794
26-5-4-4	5.3425	17.1625	7.019
26-5-4-6	4.6885	16.4385	6.184
26-5-5-1	3.8115	13.6165	4.971
26-5-5-2	4.7315	17.3775	6.708
26-5-5-3	4.8645	19.1325	6.918
26-5-6-1	3.8885	15.7115	5.854
26-5-6-2	4.0365	15.8645	6.11
26-5-6-3	4.1035	15.1965	6.032
26-5-6-4	4.0505	15.9225	6.059
26-5-6-5	3.9815	15.2185	5.972
26-6-2-1	4.9015	18.213	6.924
26-6-8-1	3.9495	16.126	6.579
26-7-1-1	3.7485	14.308	5.574
26-7-1-2	5.3925	19.864	7.726
26-7-1-3	4.7945	17.518	6.822
26-7-1-4	4.8715	19.14	7.324
26-7-1-5	3.7805	14.045	5.459
26-7-3-1	4.9205	18.793	6.849
26-7-3-2	4.8245	18.952	7.526
26-7-4-1	4.6595	16.663	7.243
26-7-5-1	4.6555	17.939	6.603
26-7-5-2	4.8125	14.065	6.797
27-7-5-3	4.7865	15.943	6.987
26-7-5-4	4.8665	19.186	7.508
26-7-5-5	5.6605	21.291	7.962
26-7-5-6	5.3685	19.213	7.51
26-7-5-7	4.8765	19.141	7.348
26-7-5-8	4.8055	16.837	6.911
26-7-5-9	5.5765	17.043	7.969
26-7-5-10	4.7565	19.108	6.889
26-7-5-11	4.6145	16.583	7.277
26-7-5-12	4.5005	17.898	6.7

[truncated: 3 more sheets: SR-27, QiiG-36, Alm-1]
