# Supplementary material for: Re-equilibration of quartz inclusions in garnet
Source: Copernicus journal article supplement (doi:10.5194/ejm-36-581-2024), 2024-08-08
Supplement: Supplementary file [file ejm-36-581-2024-supplement-title-page.pdf › ejm-36-581-2024-supplement-title-page.pdf]

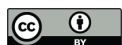

## *Supplement of*

# **Re-equilibration of quartz inclusions in garnet**

**Benjamin A. Pummell and Jay B. Thomas**

*Correspondence to:* Benjamin A. Pummell (bapummel@syr.edu)

- ejm-36-581-2024-supplement-title-page.pdf
- Supplementary Files
  - Fig. S1.docx
  - Fig. S1.pdf
  - Fig. S2.docx
  - Fig. S2.pdf
  - QuiG-SR Wavenumber Shift Data.xlsx
  - QuiG-SR Wavenumber Shift Data.xlsx
  - Fig. S1.docx
  - Fig. S2.docx

The copyright of individual parts of the supplement might differ from the article licence.
