# Supplementary figures and images for: Re-equilibration of quartz inclusions in garnet
Source: Copernicus journal article supplement (doi:10.5194/ejm-36-581-2024), 2024-08-08

### SR-3

$P_1 = 2.0$  GPa  
 $t$  at  $P_1 = 48$  hours  
 $P_2 = 1.0$  GPa  
 $t$  at  $P_2 = 48$  hours  
 $T = 800$  °C

50  $\mu\text{m}$

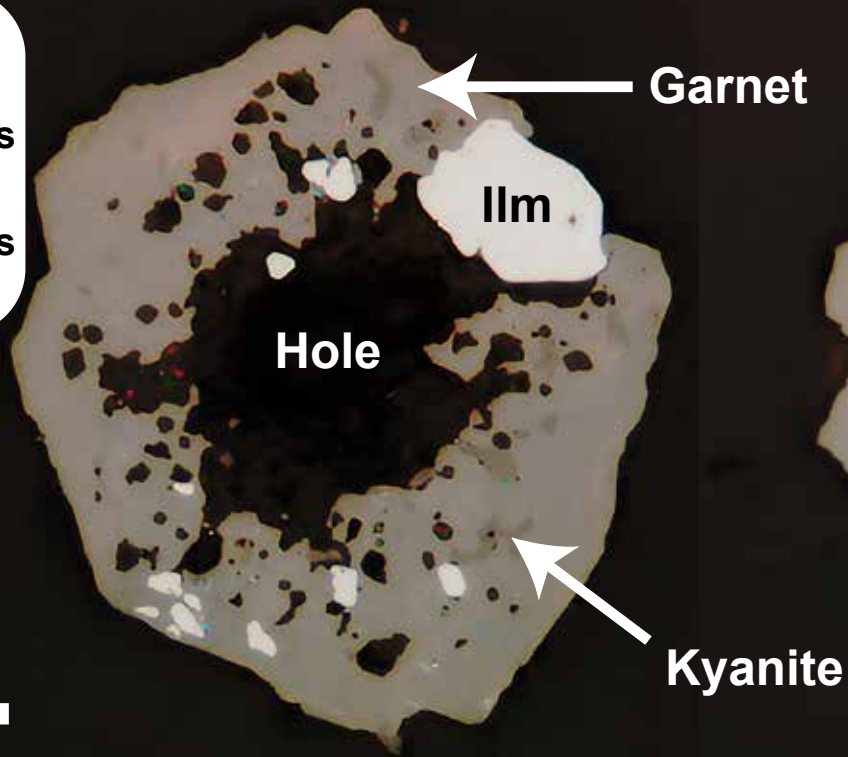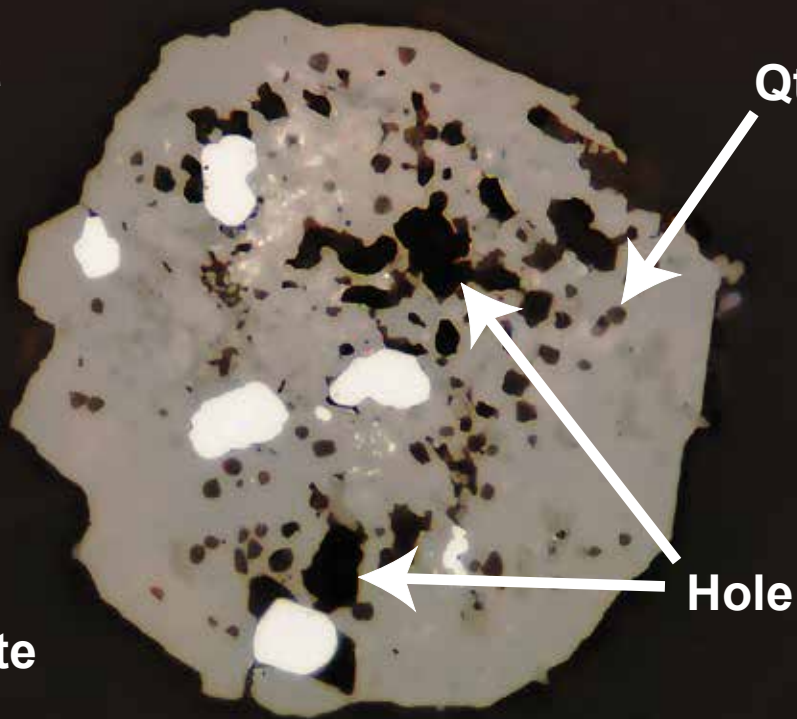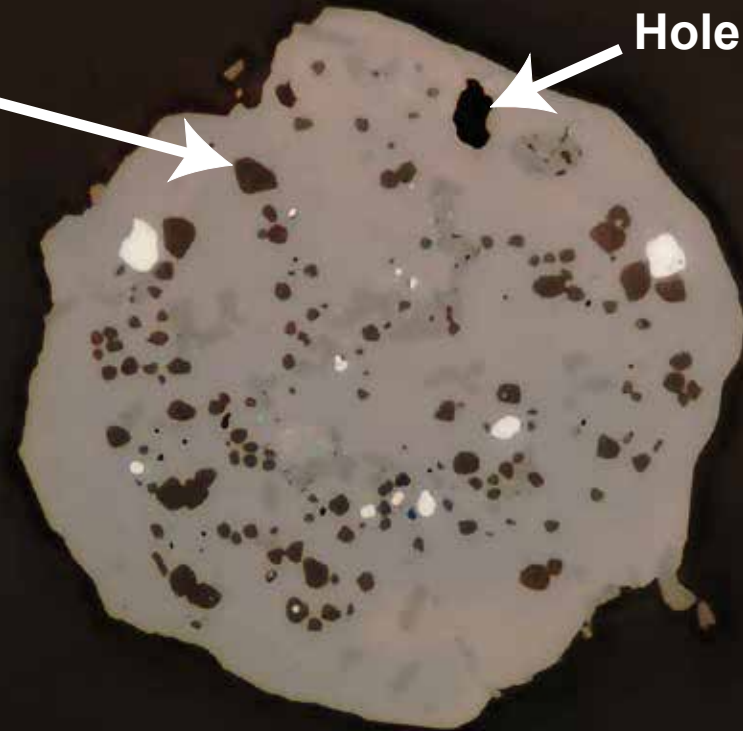

Supplement: Supplementary file 1 [file Fig. S1.pdf › Supplementary Files/Fig. S1.pdf]

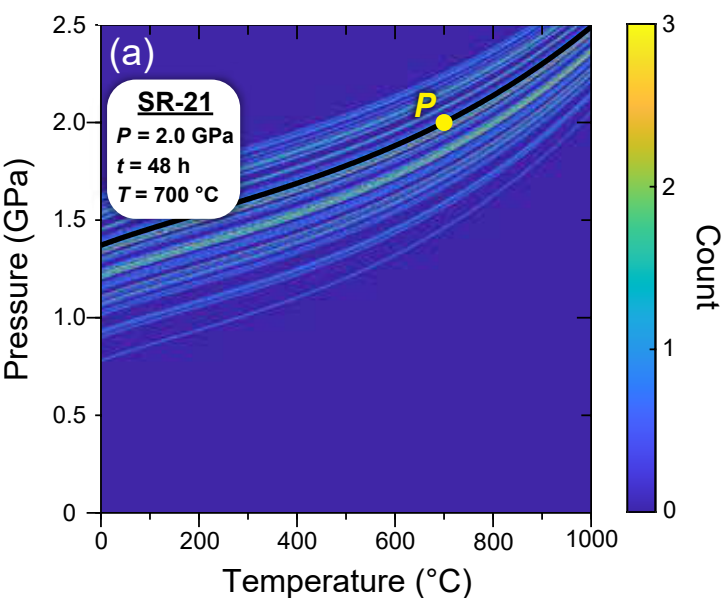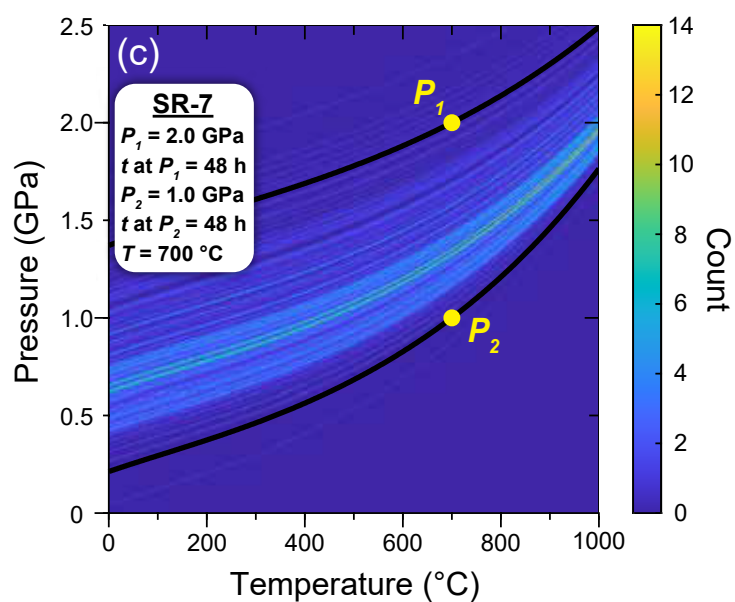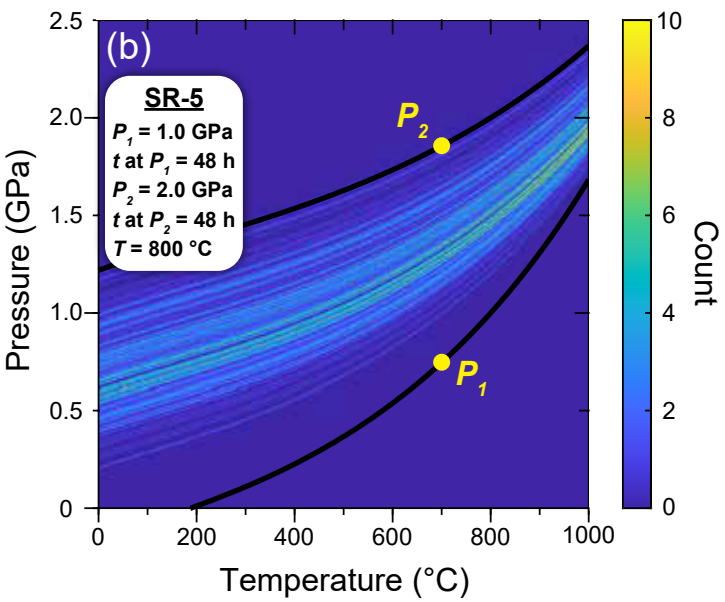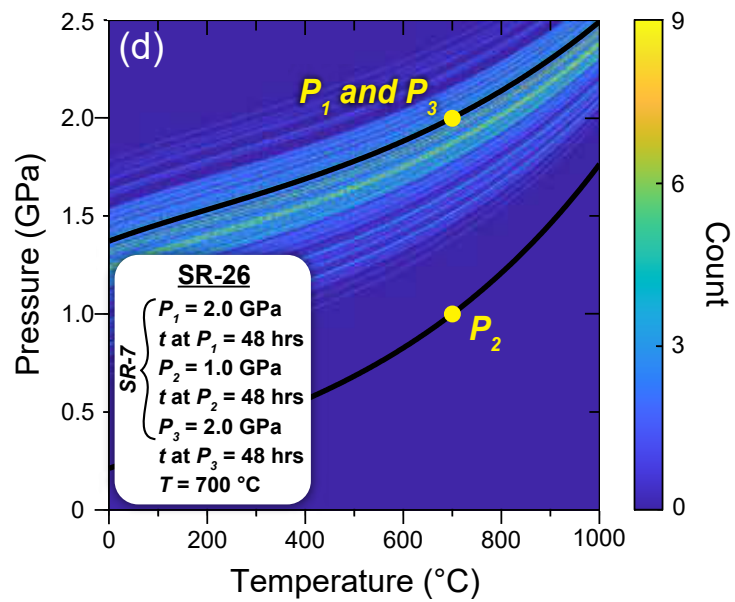

Supplement: Supplementary file 2 [file Fig. S2.pdf › Supplementary Files/Fig. S2.pdf]
